# Supplementary material
Source: PubMed Central journal article supplement (PMC10040899)
Supplement: NIHMS1833467-supplement-Appendix.pdf [file NIHMS1833467-supplement-Appendix.pdf]

## Supplementary Appendix

Supplement to: Richardson PG, Jacobus SJ, Weller EA, et al. Triplet therapy, transplantation, and maintenance until progression in myeloma. *N Engl J Med* 2022;387:132-47. DOI: 10.1056/NEJMoa2204925

This appendix has been provided by the authors to give readers additional information about the work.

## Supplementary Appendix to:

### Triplet Therapy, Transplantation, and Maintenance to Progression in Myeloma

Paul G. Richardson,<sup>1</sup> Susanna J. Jacobus,<sup>2</sup> Edie A. Weller,<sup>3</sup> Hani Hassoun,<sup>4</sup> Sagar Lonial,<sup>5</sup> Noopur S. Raje,<sup>6</sup> Eva Medvedova,<sup>7</sup> Philip L. McCarthy,<sup>8</sup> Edward N. Libby,<sup>9</sup> Peter M. Voorhees,<sup>10</sup> Robert Z. Orlowski,<sup>11</sup> Larry D. Anderson Jr,<sup>12</sup> Jeffrey A. Zonder,<sup>13</sup> Carter P. Milner,<sup>14</sup> Cristina Gasparetto,<sup>15</sup> Mounzer E. Agha,<sup>16</sup> Abdullah M. Khan,<sup>17</sup> David D. Hurd,<sup>18</sup> Krisztina Gowin,<sup>19</sup> Rammurti T. Kamble,<sup>20</sup> Sundar Jagannath,<sup>21</sup> Nitya Nathwani,<sup>22</sup> Melissa Alsina,<sup>23</sup> R. Frank Cornell,<sup>24</sup> Hamza Hashmi,<sup>25</sup> Erica Campagnaro,<sup>26</sup> Astrid C. Andreescu,<sup>27</sup> Teresa Gentile,<sup>28</sup> Michaela Liedtke,<sup>29</sup> Kelly N. Godby,<sup>30</sup> Adam D. Cohen,<sup>31</sup> Thomas H. Openshaw,<sup>32</sup> Marcelo C. Pasquini,<sup>33</sup> Sergio A. Giralt,<sup>4</sup> Jonathan L. Kaufman,<sup>5</sup> Andrew J. Yee,<sup>6</sup> Emma Scott,<sup>7</sup> Pallawi Torke,<sup>8</sup> Amy Foley,<sup>34</sup> Mariateresa Fulciniti,<sup>1</sup> Kyle Hebert,<sup>2</sup> Mehmet K. Samur,<sup>1</sup> Kelly Masone,<sup>1</sup> Michelle E. Maglio,<sup>1</sup> Andrea A. Zeytoonjian,<sup>1</sup> Omar Nadeem,<sup>1</sup> Robert L. Schlossman,<sup>1</sup> Jacob P. Laubach,<sup>1</sup> Claudia Paba-Prada,<sup>1</sup> Irene M. Ghobrial,<sup>1</sup> Aurore Perrot,<sup>35</sup> Philippe Moreau,<sup>36</sup> Hervé Avet-Loiseau,<sup>37</sup> Michel Attal,<sup>35</sup> Kenneth C. Anderson,<sup>1\*</sup> Nikhil C. Munshi<sup>1,38\*</sup>

## Supplementary Appendix

| Contents                                                                                                                                                                | Page      |
|-------------------------------------------------------------------------------------------------------------------------------------------------------------------------|-----------|
| <b>DFCI 10-106 DETERMINATION: accruing sites and principal investigators</b>                                                                                            | <b>3</b>  |
| <b>Supplementary Methods</b>                                                                                                                                            | <b>5</b>  |
| Study oversight                                                                                                                                                         | 5         |
| Concomitant medications                                                                                                                                                 | 5         |
| Objectives, end points, and definitions                                                                                                                                 | 5         |
| Bone marrow aspirate and peripheral blood sample collection                                                                                                             | 7         |
| Assessment of quality of life and patient-reported outcomes                                                                                                             | 7         |
| Evaluation of minimal residual disease                                                                                                                                  | 7         |
| Correlative studies                                                                                                                                                     | 8         |
| Interim analyses                                                                                                                                                        | 8         |
| Study design history                                                                                                                                                    | 9         |
| Additional statistical analyses                                                                                                                                         | 9         |
| <b>Supplementary Figures</b>                                                                                                                                            |           |
| Figure S1: Study treatment schema                                                                                                                                       | 11        |
| Figure S2: Exposure to lenalidomide maintenance treatment over time                                                                                                     | 12        |
| Figure S3: Forest plot of progression-free survival in additional patient subgroups                                                                                     | 13        |
| Figure S4: Kaplan–Meier analyses of progression-free survival according to randomization stratification factors                                                         | 14        |
| Figure S5: Kaplan–Meier analysis of time to progression in the intent-to-treat population                                                                               | 17        |
| Figure S6: Kaplan–Meier analysis of duration of response in responding patients                                                                                         | 18        |
| Figure S7: Kaplan–Meier analysis of progression-free survival by MRD status                                                                                             | 19        |
| Figure S8: Forest plot of overall survival, including subgroup analyses by stratification factors and other key baseline patient and disease characteristics            | 20        |
| Figure S9: Kaplan–Meier analyses of overall survival according to randomization stratification factors                                                                  | 21        |
| Figure S10: Cumulative incidence of second primary malignancies                                                                                                         | 24        |
| Figure S11: Mean quality of life domain scores at baseline and on-treatment assessment timepoints                                                                       | 27        |
| Figure S12: Kaplan–Meier analysis of event-free survival in the intent-to-treat population                                                                              | 30        |
| <b>Supplementary Tables</b>                                                                                                                                             |           |
| Table S1: Eligibility criteria – hematologic, hepatic, renal, and cardiac parameters                                                                                    | 31        |
| Table S2: Treatment-related adverse events of any grade reported during treatment (induction through maintenance) in at least 2% of RVd-alone or RVd+ASCT patients      | 32        |
| Table S3: Treatment-related adverse events (any grade and grade 3 or higher) reported during maintenance in at least 2% of patients receiving maintenance in either arm | 36        |
| Table S4: Serious adverse events reported in the RVd-alone and RVd+ASCT arms                                                                                            | 39        |
| Table S5: Second primary malignancies reported in the RVd-alone and RVd+ASCT arms                                                                                       | 40        |
| Table S6: Compliance with patient-reported quality-of-life assessments among patients in the RVd-alone and RVd+ASCT populations                                         | 41        |
| Table S7: Summary of subsequent therapies received                                                                                                                      | 42        |
| <b>Supplementary References</b>                                                                                                                                         | <b>43</b> |

## DFCI 10-106 DETERMINATION: accruing sites and principal investigators

| Site                                                                              | Enrolling Principal investigator(s)                                                                                                                                 |
|-----------------------------------------------------------------------------------|---------------------------------------------------------------------------------------------------------------------------------------------------------------------|
| Dana-Farber Cancer Institute                                                      | Paul G. Richardson<br>Omar Nadeem<br>Robert L. Schlossman<br>Jacob P. Laubach<br>Claudia Paba-Prada<br>Irene M. Ghobrial<br>Kenneth C. Anderson<br>Nikhil C. Munshi |
| Memorial Sloan Kettering Cancer Center                                            | Hani Hassoun                                                                                                                                                        |
| Winship Cancer Institute of Emory University                                      | Sagar Lonial<br>Jonathan L. Kaufman<br>Ajay K. Nooka                                                                                                                |
| Massachusetts General Hospital                                                    | Noopur S. Raje<br>Andrew J. Yee                                                                                                                                     |
| Knight Cancer Institute, Oregon Health & Science University                       | Eva Medvedova<br>Emma Scott                                                                                                                                         |
| Roswell Park Comprehensive Cancer Center                                          | Philip L. McCarthy<br>Pallawi Torka                                                                                                                                 |
| University of Washington, Fred Hutchinson Cancer Center                           | Edward N. Libby                                                                                                                                                     |
| University of North Carolina                                                      | Peter M. Voorhees<br>Brandi Reeves                                                                                                                                  |
| The University of Texas MD Anderson Cancer Center                                 | Robert Z. Orlowski<br>Michael Wang                                                                                                                                  |
| Simmons Comprehensive Cancer Center, UT Southwestern Medical Center               | Larry D. Anderson Jr                                                                                                                                                |
| Barbara Ann Karmanos Cancer Institute / Wayne State University School of Medicine | Jeffrey A. Zonder                                                                                                                                                   |
| University of Mississippi Medical Center                                          | Carter P. Milner<br>Tondre Buck                                                                                                                                     |
| Duke University Medical Center                                                    | Cristina Gasparetto<br>Gwynn Long                                                                                                                                   |
| UPMC (University of Pittsburgh Medical Center) Hillman Cancer Center              | Mounzer Agha                                                                                                                                                        |
| The Ohio State University Comprehensive Cancer Center                             | Abdullah Khan<br>Yvonne A. Efebera                                                                                                                                  |
| Wake Forest University School of Medicine                                         | David D. Hurd<br>Cesar Rodriguez Valdes                                                                                                                             |
| University of Arizona, Department of Bone Marrow Transplant and Cellular Therapy  | Kristina Gowin<br>Faiz Anwer<br>Amit Agarwal                                                                                                                        |
| Dan L Duncan Comprehensive Cancer Center, Baylor College of Medicine              | Rammurti T. Kamble                                                                                                                                                  |
| Hematology and Oncology, Icahn School of Medicine at Mount Sinai                  | Sundar Jagannath                                                                                                                                                    |

|                                                                                                                                                                        |                                                                |
|------------------------------------------------------------------------------------------------------------------------------------------------------------------------|----------------------------------------------------------------|
| Judy and Bernard Briskin Center for Multiple Myeloma Research, City of Hope Comprehensive Cancer Center                                                                | Nitya Nathwani<br>Amrita Krishnan                              |
| Department of Blood and Marrow Transplantation and Cellular Immunotherapy, H. Lee Moffitt Cancer Center and Research Institute<br>Vanderbilt University Medical Center | Melissa Alsina<br>R. Frank Cornell<br>Michael R. Savona        |
| Division of Hematology Oncology, Medical University of South Carolina                                                                                                  | Hamza Hashmi<br>Saurabh Chhabra                                |
| Division of Hematology and Oncology, Department of Internal Medicine, University of Michigan                                                                           | Erica Campagnaro<br>Daniel Couriel                             |
| Eastern Maine Medical Center--EMMC Cancer Care Center<br>SUNY Upstate Medical University                                                                               | Astrid A. Andreescu<br>Thomas Openshaw<br>Teresa Gentile       |
| Department of Medicine, Division of Hematology, Stanford University<br>O'Neal Comprehensive Cancer Center, the University of Alabama at Birmingham                     | Michaela Liedtke<br>Kelly N. Godby<br>Racquel D. Innis-Shelton |
| Abramson Cancer Center, University of Pennsylvania [UPenn]<br>Davenport-Mugar Cancer Center, Cape Cod Hospital                                                         | Adam D. Cohen<br>Thomas Openshaw<br>Frank Basile               |
| Cancer Center at Beth Israel Deaconess Medical Center<br>Ochsner Cancer Institute                                                                                      | David Avigan<br>Carter Davis                                   |
| Moore's Cancer Center at University of California San Diego<br>Colorado Blood Cancer Institute                                                                         | Caitlin Costello<br>Jeffrey Matous                             |
| Mass General Cancer Center at Newton-Wellesley<br>UCSF Helen Diller Family Comprehensive Cancer Center                                                                 | Robb Friedman<br>Jeffrey Wolf                                  |
| Rush University Cancer Center<br>St. Luke's Cancer Institute                                                                                                           | Sunita Nathan<br>William Kreislew                              |
| University of Chicago Comprehensive Cancer Center<br>University of Florida Health Cancer Center                                                                        | Andrzej Jakubowiak<br>John Himenz                              |
| Fox Chase Comprehensive Cancer Center<br>Solinsky Center for Cancer Care, New Hampshire Oncology and Hematology                                                        | Henry Fung<br>Douglas Weckstein                                |
| Wilmot Cancer Institute – University of Rochester Medical Center<br>Herbert Irving Comprehensive Cancer Center (HICCC) at Columbia University Medical Center           | Michael Becker<br>Suzanne Lentzsch                             |
| Gibbs Cancer Center & Research Institute – Spartanburg<br>Case Comprehensive Cancer Center                                                                             | Tondre Buck<br>Hillard Lazarus                                 |

## **Supplementary Methods**

### **Study oversight**

The trial was conducted in accordance with the International Council for Harmonisation guidelines for Good Clinical Practice, US Code of Federal Regulations governing clinical study conduct and ethical principles that have their origin in the Declaration of Helsinki, US state laws, and Dana-Farber/Harvard Cancer Center research policies and procedures. An independent Data and Safety Monitoring Committee (DMC) and study Steering Committee regularly reviewed safety, study progress, and interim analyses of outcome data. A central response review committee reviewed all response and progression coding.

### **Concomitant medications**

Thromboprophylaxis, herpes zoster prophylaxis, and concomitant bisphosphonates were required during cycles of RVd. Thromboprophylaxis was provided with aspirin, low-molecular-weight heparin, or enoxaparin based on the risk determined by the patient's treating physician. Herpes zoster prophylaxis comprised acyclovir or valaciclovir or equivalent.

### **Objectives, end points, and definitions**

The primary objective was to compare progression-free survival (PFS) between the two arms. The primary endpoint of PFS was defined as time from randomization to the earlier of disease progression as determined by central review or death from any cause (events). Patients who started non-protocol therapy (NPT) were censored at the date of NPT initiation if available or date treatment ended if date of NPT was missing. Deaths occurring beyond 1 year from the date last known progression-free are not counted as events and censored at date of last disease evaluation. Patients who had not started NPT, progressed, or died were censored at the date of last disease evaluation. All patients were followed until disease progression and death. In a sensitivity analysis for PFS, patients who received NPT were not censored.

Secondary objectives were to compare response rates, duration of response (DOR), time to progression (TTP), overall survival (OS), safety, tolerability, and quality of life (QoL) between the two arms, to define genetic prognostic groups evaluated by gene expression profiling (GEP), and to examine the best treatment in each GEP-defined prognostic group. An additional secondary objective was to collect medical resource utilization (MRU) information for potential use in economic evaluation models (data not reported in this manuscript). Event-free survival (EFS) is also reported as a post-hoc sensitivity analysis to evaluate the impact of censoring for non-protocol therapy. In the primary endpoint of PFS, patients are censored at the time of non-

protocol therapy, and in the EFS analysis, patients are considered failures at the time of non-protocol therapy.

For the secondary end points of response rates and DOR, disease response was assessed using criteria based upon the International Myeloma Working Group (IMWG) uniform response criteria.<sup>1,2</sup> Patients with serum free light chain (FLC) level as their only measurable disease parameter were assessed according to FreeLite™ disease response criteria.<sup>3</sup> Disease response according to modified European Group for Blood and Marrow Transplantation (EBMT) response criteria was also collected as a secondary measure. Disease response was confirmed by two consecutive assessments made at any time before initiation of new therapy (IMWG criteria) or at a minimum of 6 weeks apart (EBMT criteria). Disease response assessments underwent central review, which was performed on the following disease response measures: M-protein quantification and immunofixation from serum, 24-hour urine collection, and serum FLC testing. DOR was defined as the time from documented best response to documented disease progression per IMWG criteria, and was estimated separately in patients achieving complete or partial response as best IMWG response.

TTP was defined as time from randomization to time of documented IMWG disease progression or censoring time (time of last disease evaluation for those alive, time to death among those who died). Similar to the PFS analysis, patients initiating non-protocol therapy prior to progression or death were censored at the date of non-protocol therapy in the TTP analysis. EFS was defined as the time from randomization to the earliest of IMWG disease progression, death, or initiation of non-protocol therapy (events); patients were censored date of last disease evaluation. OS was defined as time from randomization to death due to any cause; patients alive were censored at date last known alive.

For the QoL end points, QoL domains from the European Organization for Research and Treatment of Cancer (EORTC) Quality of Life Questionnaire – Core-30 (QLQ-C30) module, the EORTC QLQ-MY20 multiple myeloma module, and the Functional Assessment of Cancer Therapy/Gynecologic Oncology Group–Neurotoxicity (FACT/GOG-NTX) side-effects questionnaire were compared between arms. These included the domains of health-related QoL, distress, psychological functioning, physical well-being, and functional well-being.

Safety end points comprised all serious adverse events, treatment-related adverse events, and laboratory data, categorized and graded, experienced from cycle 1 onwards and on maintenance only. Second primary malignancies (SPM) were evaluated separately, and the

cumulative incidence of SPMs was estimated with death as a competing risk overall and by class (invasive, hematologic, solid, non-melanoma skin). Tolerability end points included dose modifications on RVd, rates of mobilization failure, and estimates of treatment exposure on maintenance; data not reported in the present manuscript. Treatment duration (months) was also estimated from randomization and start of maintenance by Kaplan–Meier methods.

### **Bone marrow aspirate and peripheral blood sample collection**

Bone marrow aspirate samples for response evaluation and correlative analyses, plus peripheral blood samples for correlative analyses, were planned to be collected at screening, at the time of response assessment or confirmation (for patients achieving a very good partial response or better) if clinically indicated, within 42 days of ASCT (RVd+ASCT arm), on day 1 of RVd cycle 4 (RVd+ASCT arm), prior to lenalidomide maintenance, and at the time of disease relapse or progression. Samples were also to be collected annually during maintenance from patients providing additional informed consent.

### **Assessment of quality of life and patient-reported outcomes**

Patients were requested to complete the European Organization for Research and Treatment of Cancer (EORTC) Quality of Life Questionnaire – Core-30 (QLQ-C30) module, the EORTC QLQ-MY20 multiple myeloma module, and the Functional Assessment of Cancer Therapy/Gynecologic Oncology Group–Neurotoxicity (FACT/GOG-NTX) side-effects questionnaire at nine time points: at baseline, on day 1 of RVd cycle 2, prior to cyclophosphamide mobilization, post-ASCT and prior to RVd cycle 4 (RVd+ASCT arm only), on day 1 of RVd cycles 5 and 8 (RVd-alone arm only), on day 1 of cycle 6 of lenalidomide maintenance therapy, at 2 and 3 years post baseline, and at end of study treatment.

### **Evaluation of minimal residual disease**

Bone marrow aspirate samples obtained from patients prior to the start of lenalidomide maintenance and after 1 year of maintenance were sent for central laboratory evaluation of minimal residual disease (MRD) using the validated, US Food and Drug Administration-approved clonoSEQ® next-generation sequencing platform (Adaptive Biotechnologies) with a minimum sensitivity of  $1 \times 10^{-5}$ . Patients with MRD levels of  $<1 \times 10^{-5}$  were classified as MRD-negative, and those with levels of  $\geq 1 \times 10^{-5}$  were classified as MRD-positive. PFS was evaluated by MRD status at the start of maintenance therapy and by treatment arm, with PFS time being from the start of maintenance.



## **Correlative studies**

Proposed correlative studies were to conduct gene expression profiling (GEP) using whole genome sequencing (WGS) and correlate findings with clinical outcomes, and to investigate genomic changes at the time of progression or relapse and evaluate mechanisms underlying genomic instability. In order to identify genomic alterations and correlate with clinical outcome, the role of DNA copy number alterations (CNAs) by high throughput single nucleotide polymorphism (SNP) array analysis, as well as WGS and gene expression changes by expression array, were to be analyzed for response and survival. mRNA splicing by exon array and microRNA profiles in study participants were to be evaluated and correlated with clinical endpoints. Both the direct and indirect relationship between CNAs and gene expression changes were also to be investigated. To investigate genomic changes at the time of progression or relapse and evaluate mechanisms underlying genomic instability, genome-wide SNP analyses, expression profiling, and WGS on paired samples obtained at the time of diagnosis and at the time of progression or relapse were planned to be performed to identify genomic regions with amplifications, deletions, and changes in heterozygosity. It was planned to evaluate mutations in light of the known pattern of changes and identify those which may predict different clinical outcomes. Based on data showing that elevated homologous recombination (HR) activity plays a significant role in ongoing genomic instability in myeloma, HR activity in primary myeloma samples was to be measured to correlate with acquisition of new genomic changes as well as clinical outcome.

In the preliminary WGS analyses reported in this paper, we analyzed data from CD138+ myeloma cells purified from screening bone marrow samples from 140 patients. These patients were equally distributed between the RVd and RVd+ASCT arms. Data were evaluated to correlate best response achieved with genomic features, and with 140 patients the correlative analysis is not powered to detect genomic features associated with survival.

## **Interim analyses**

Interim analyses were planned at 33% and 69% information and the final analysis at full information. These results were presented to the data monitoring committee. To preserve the overall type I error rate, critical values at the interim analyses were determined using the Lan-DeMets error spending rate function corresponding to the O'Brien-Fleming boundary. The O'Brien-Fleming upper boundary at 33%, 69%, and 100% information is 3.7334, 2.4670, and 1.9996, with corresponding nominal significance levels of 0.0000944467, 0.00681167, and 0.0227744, respectively. The study was also monitored for early stopping in favor of the null hypothesis using Jennison-Turnbull repeated confidence interval (CI) methodology. At each

interim analysis, the one-sided 97.5% repeated confidence upper limit on the HR was computed using the critical value from the error spending function. Data cut-off for this full-information analysis (328/329 progression-free survival events, 99.7%) was December 10, 2021.

### **Study design history**

Originally this study was planned to be conducted together with the IFM 2009 study.<sup>4,5</sup> The primary endpoint of PFS was to have been compared between Arm A (RVd-only) and Arm B (transplantation), with patients stratified by country/region (United States vs Intergroupe Francophone du Myélome [IFM]) as well as by cytogenetics risk category and International Staging System (ISS) disease stage. With a planned population size of 1000 patients (and full information of 658 events under the alternative hypothesis), the two studies combined had 92% power to detect a 23% reduction in the hazard of progression or death in Arm B versus Arm A, corresponding to a hazard ratio (HR) of 1.30 (Arm A vs Arm B), using a stratified two-sided log-rank test with an overall type I error rate of 0.05.

Based on evidence supporting the benefit of lenalidomide maintenance given until disease progression,<sup>6</sup> the protocol for this study, DFCI 10-106, was revised in October 2012 to extend duration of lenalidomide maintenance from 1 year to until disease progression. The IFM 2009 trial protocol retained the duration of lenalidomide maintenance as 1 year. At this time, the two trials were separated, and both trials were powered independently to detect a PFS benefit. Based on assumed hazard rates at the time, the sample size for the DFCI 10-106 study was 660 patients. Subsequently, results from a meta-analysis of the benefit of lenalidomide maintenance therapy<sup>7</sup> indicated a potentially lower-than-assumed hazard rate for PFS with lenalidomide maintenance. With a reduction in the failure rate, the time to the full information could be longer than expected. Therefore, the sample size was increased further, to 720 randomized patients, to account for potential reduction in hazard rates and reduce the time to full information of the primary endpoint of PFS by 5 months. All modifications to the study design were presented to the DMC and the Steering Committee for review and approval.

### **Additional statistical analyses**

Patient characteristics were summarized using proportions for categorical data and median for continuous variables. Best response rates (complete response, very good partial response or better, and partial response or better) were compared between arms using Fisher's exact test, with at least 80% power to detect differences of at least 11 percentage points (two-sided significance level of 0.05). Duration of response was estimated using the Kaplan-Meier Method and compared between responding patients in each arm using a log-rank test. The estimated

odds ratio and the 95% CI are provided to evaluate the association of response and MRD. For treatment exposure, the mean (standard deviation) of the average lenalidomide dose across each 28-day cycle is reported by cycle. The proportion of cycles for which the average dose of lenalidomide was at least 10 mg is reported per patient. Maintenance treatment exposure information was missing for 8 and 7 patients on the RVd-alone and RVd+ASCT arms, respectively.

The incidence rates of grade 3 or higher adverse events were compared between groups using Fisher's exact test, with at least 80% power to detect differences between groups of at least 10 percentage points for more common (incidence rate >20%) toxicities or at least 5 percentage points for rate (incidence rate <10%) toxicities (two-sided significance level of 0.05). Changes in quality-of-life instrument domain scores from baseline were compared between groups using a two-sided t-test, with Bonferroni correction to adjust for seven multiple comparisons over the time points (this excluded the end of treatment). All quality-of-life analyses included only patients that submitted at least a baseline form and one or more follow-up forms, similar to data reported from the IFM 2009 study,<sup>8</sup> with similar results seen. With 400 or 700 subjects with QOL assessments complete, the effect size that can be detected with 80% power between the two arms in the change of QOL scores from time of randomization (two-sided t-test with a 0.05/8 significance level) are 0.36 and 0.25, respectively.

## Figure S1: Study treatment schema.

Protocol-planned therapy on the RVd-alone (left) and RVd+ASCT (right) arms.

ASCT, autologous stem cell transplantation. GCSF, granulocyte colony-stimulating factor. IV, intravenously. PO, orally. RVd, lenalidomide, bortezomib, dexamethasone. SC, subcutaneously.

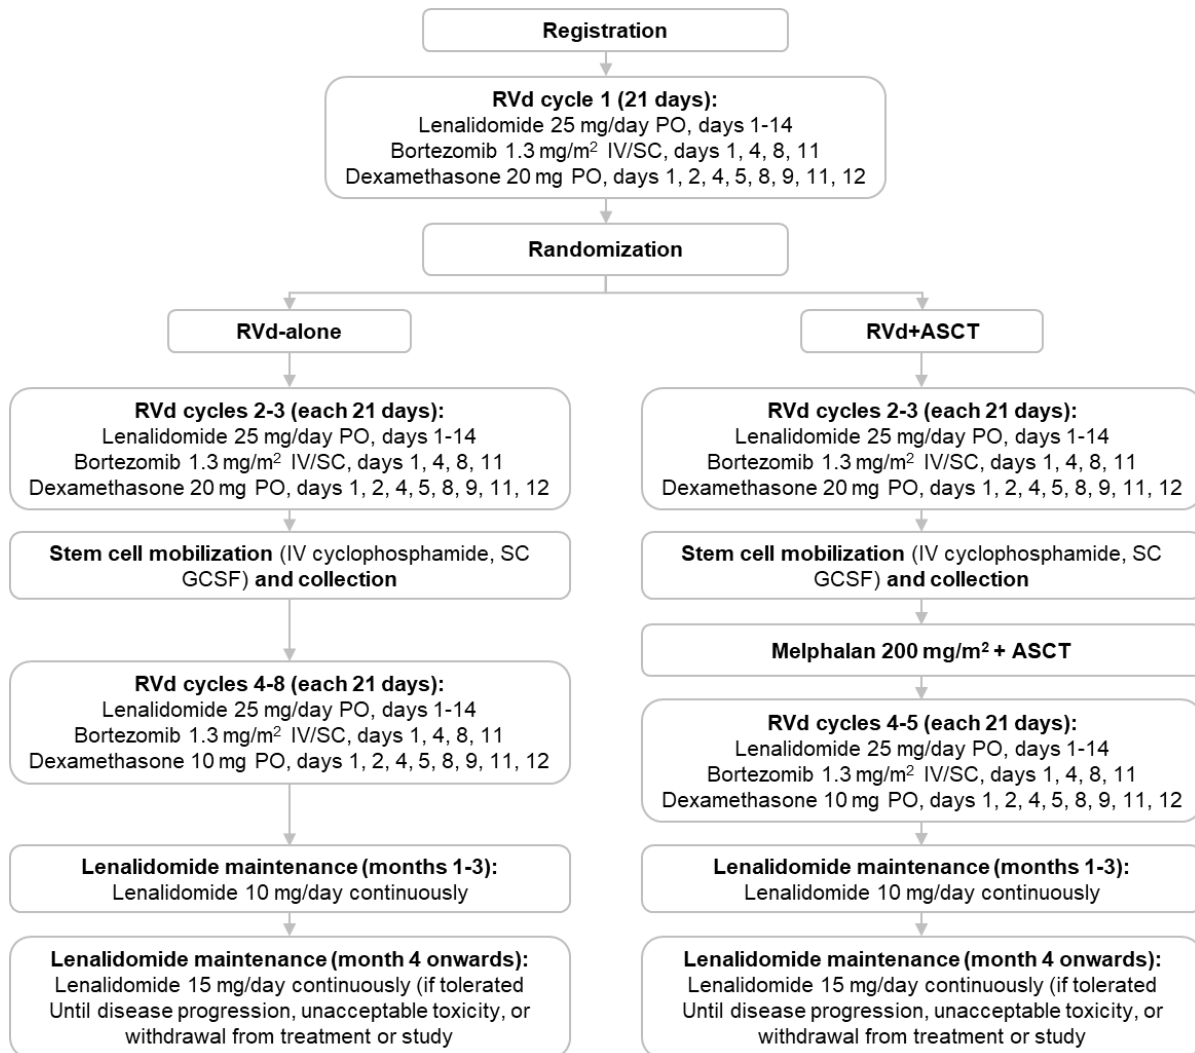

**Figure S2: Exposure to lenalidomide maintenance treatment over time**

Average lenalidomide dose was determined for each 28-day cycle; the mean of the average lenalidomide dose is shown by treatment cycle.

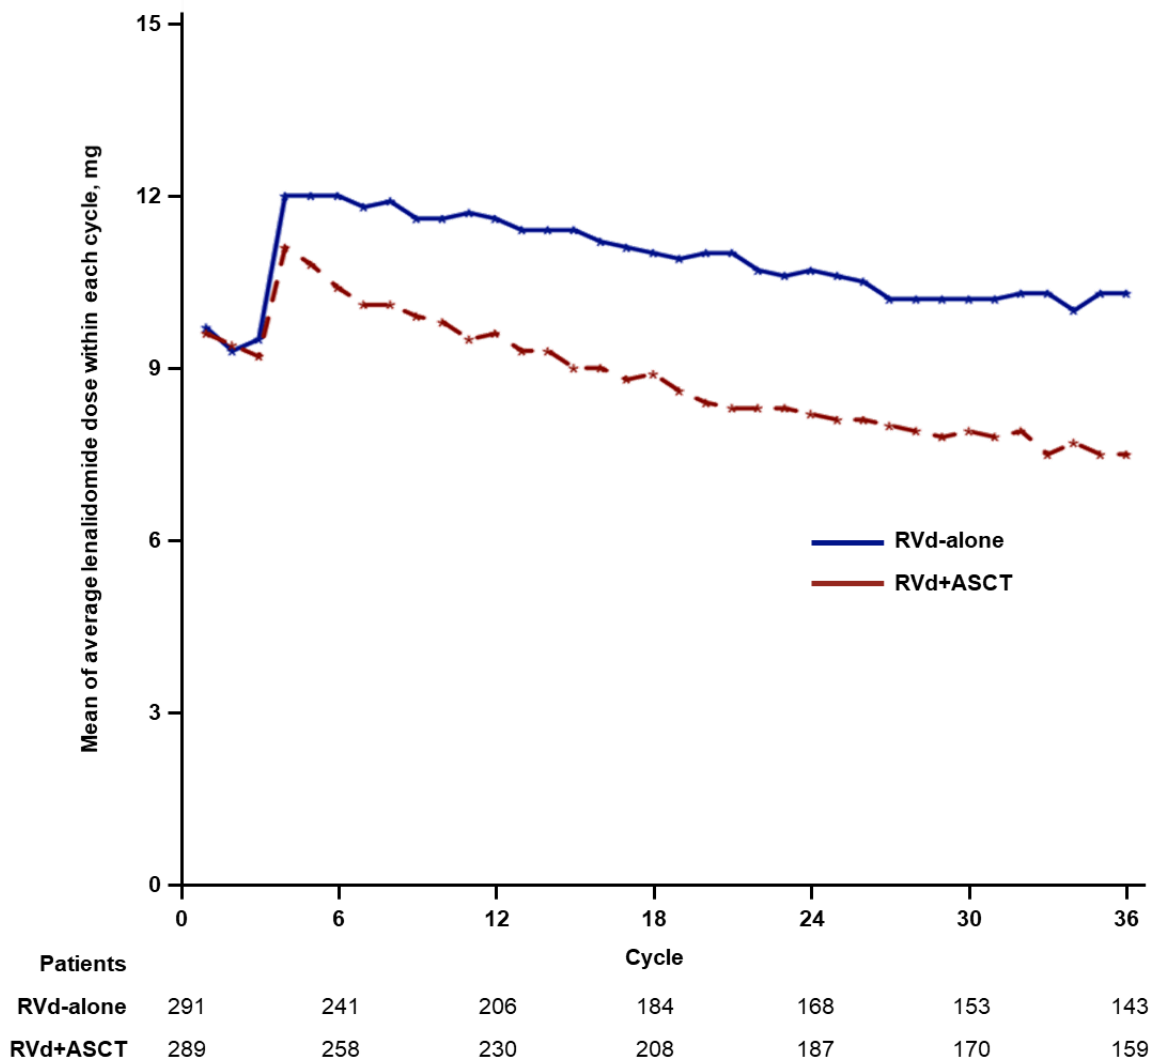

**Figure S3: Forest plot of progression-free survival, including subgroup analyses by stratification factors and other key baseline patient and disease characteristics.**

Forest plot of progression-free survival, including subgroup analyses by stratification factors and other key baseline patient and disease characteristics. Subgroup data not shown for t(14;16) due to small event and patient numbers (5/10 vs 5/15, median 19.8 months vs not reached; HR 2.18, 95% CI: 0.57–8.31). The widths of the CIs have not been adjusted for multiplicity, and so the intervals should not be used in place of a hypothesis test. ASCT, autologous stem cell transplantation. CI, confidence interval. ECOG, Eastern Cooperative Oncology Group. ISS, International Staging System. ITT, intent-to-treat. HR, hazard ratio. RVd, lenalidomide, bortezomib, dexamethasone.

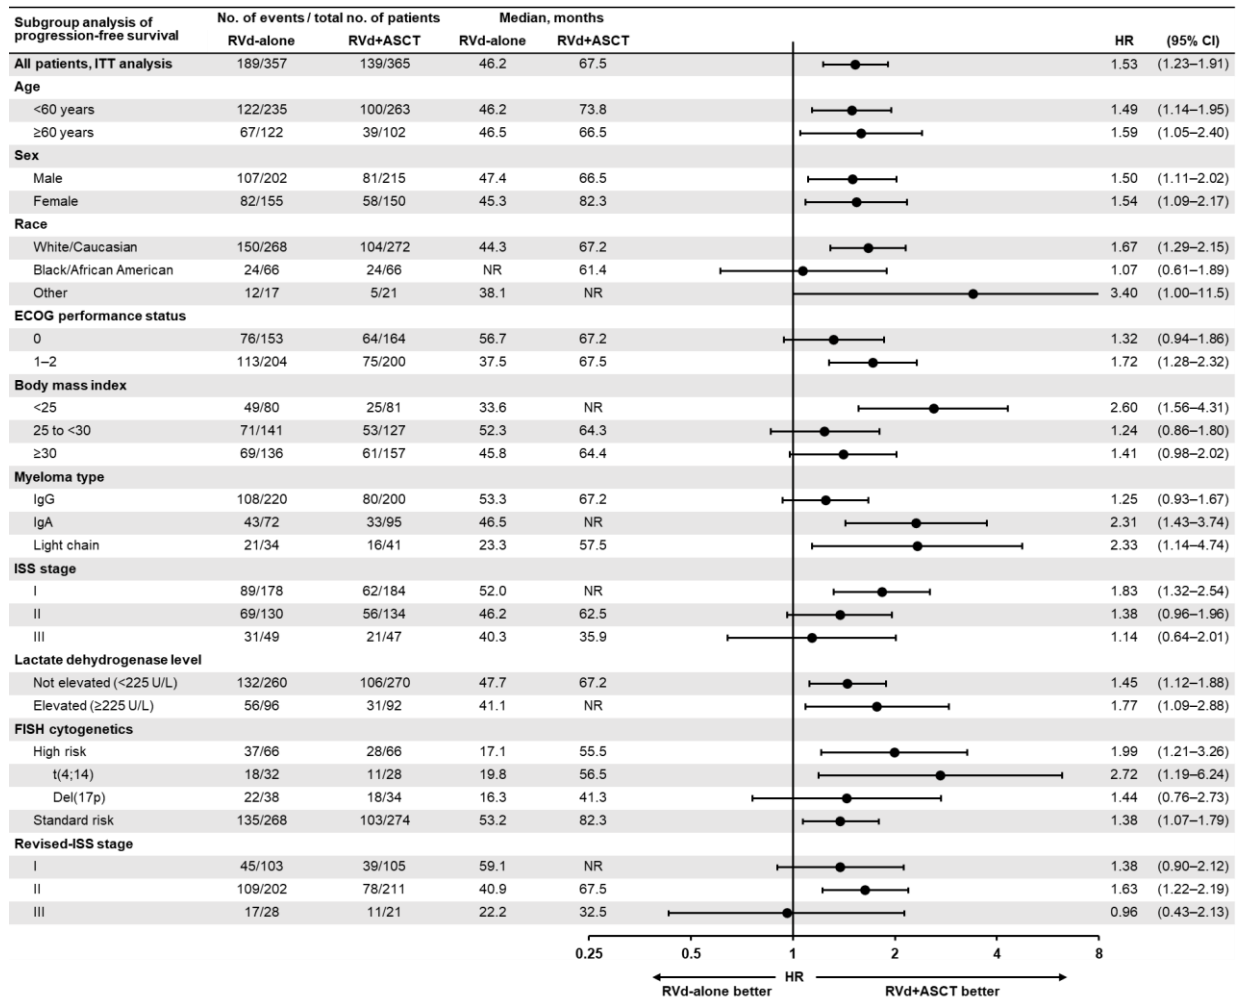

**Figure S4: Kaplan–Meier analyses of progression-free survival according to randomization stratification factors.**

Progression-free survival with RVd-alone and RVd+ASCT in patients with ISS stage (A) I, (B) II, and (C) III disease, and in patients with (D) high-risk, (E) standard-risk, and (F) non-evaluable cytogenetics. Shaded areas indicate 95% CIs. ASCT, autologous stem cell transplantation. CI, confidence interval. ISS, International Staging System. PFS, progression-free survival. RVd, lenalidomide, bortezomib, dexamethasone. \*The widths of the CIs have not been adjusted for multiplicity, and so the intervals should not be used in place of a hypothesis test.

**A**

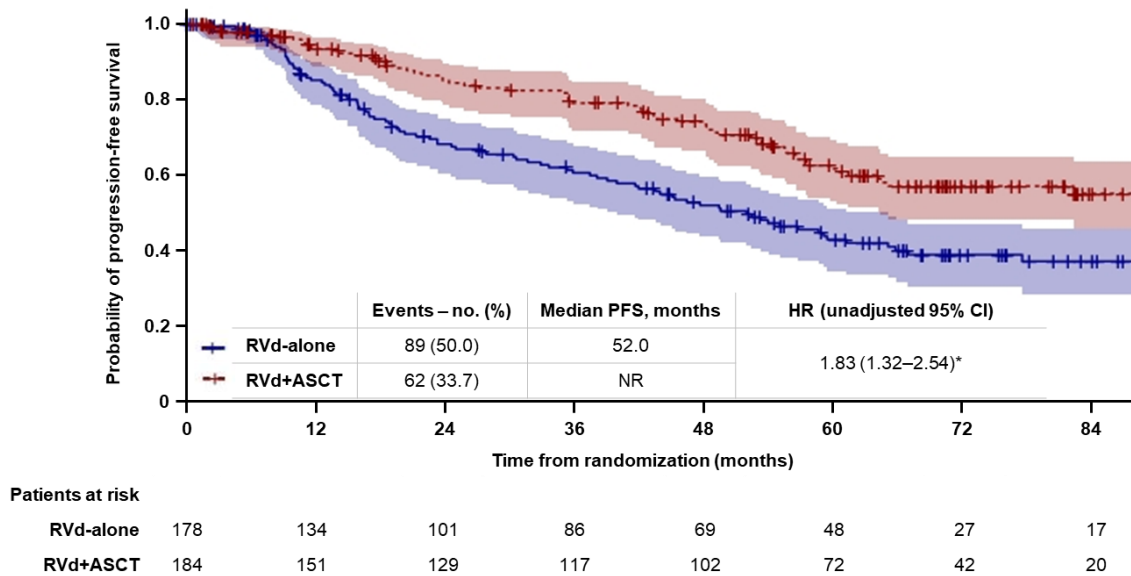

**B**

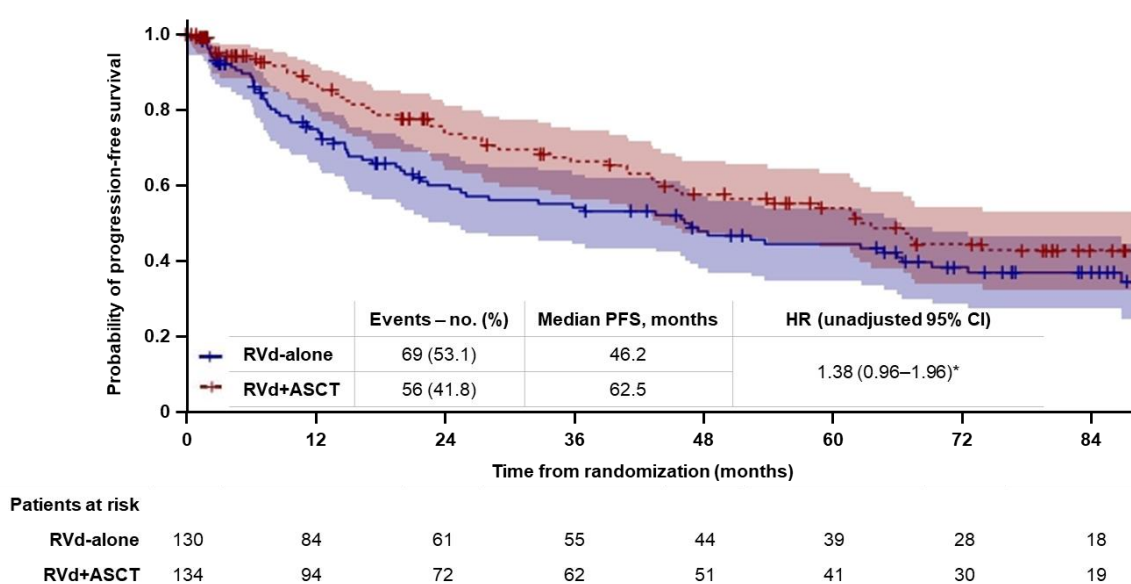

C

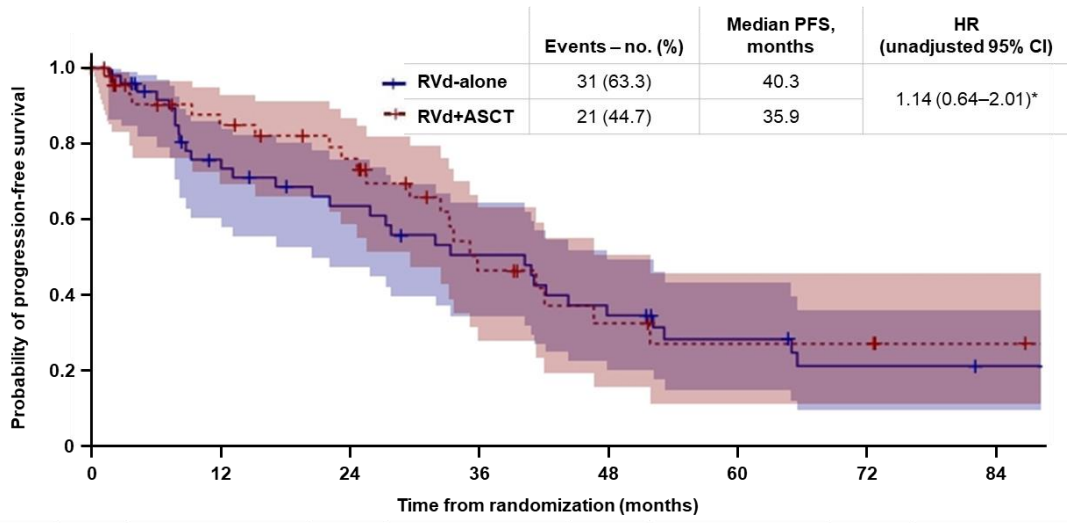

| Patients at risk |    | 0  | 12 | 24 | 36 | 48 | 60 | 72 | 84 |
|------------------|----|----|----|----|----|----|----|----|----|
| RVD-alone        | 49 | 32 | 25 | 19 | 13 | 9  | 6  | 5  |    |
| RVD+ASCT         | 47 | 31 | 25 | 12 | 7  | 5  | 5  | 3  |    |

D

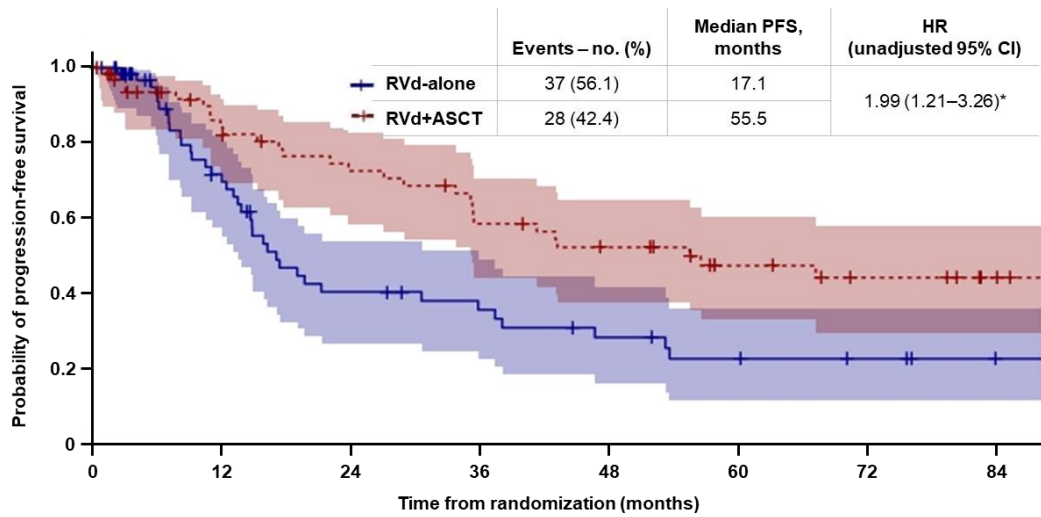

| Patients at risk |    | 0  | 12 | 24 | 36 | 48 | 60 | 72 | 84 |
|------------------|----|----|----|----|----|----|----|----|----|
| RVD-alone        | 66 | 36 | 19 | 16 | 11 | 8  | 6  | 3  |    |
| RVD+ASCT         | 66 | 45 | 37 | 29 | 24 | 16 | 12 | 8  |    |



**E**

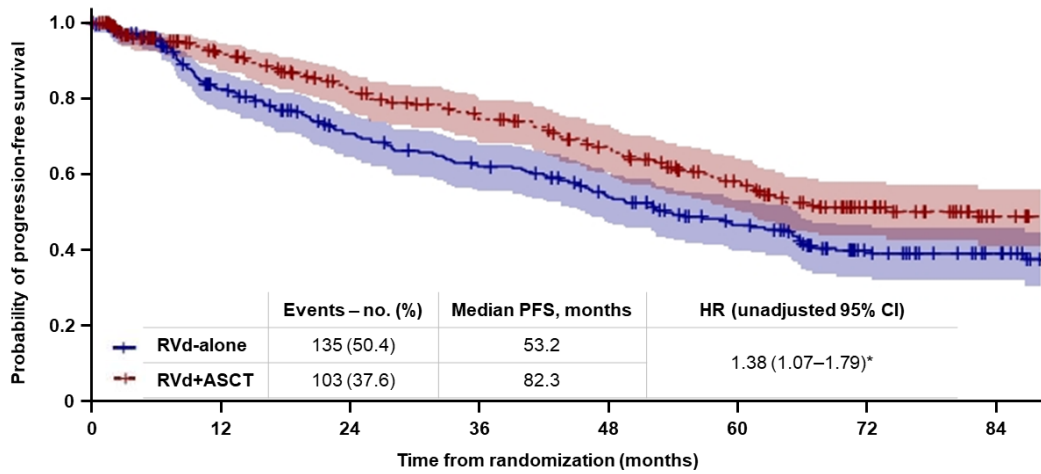

Patients at risk

|           |     |     |     |     |     |    |    |    |
|-----------|-----|-----|-----|-----|-----|----|----|----|
| RVD-alone | 268 | 197 | 156 | 134 | 109 | 83 | 50 | 34 |
| RVD+ASCT  | 274 | 212 | 175 | 151 | 126 | 94 | 58 | 29 |

**F**

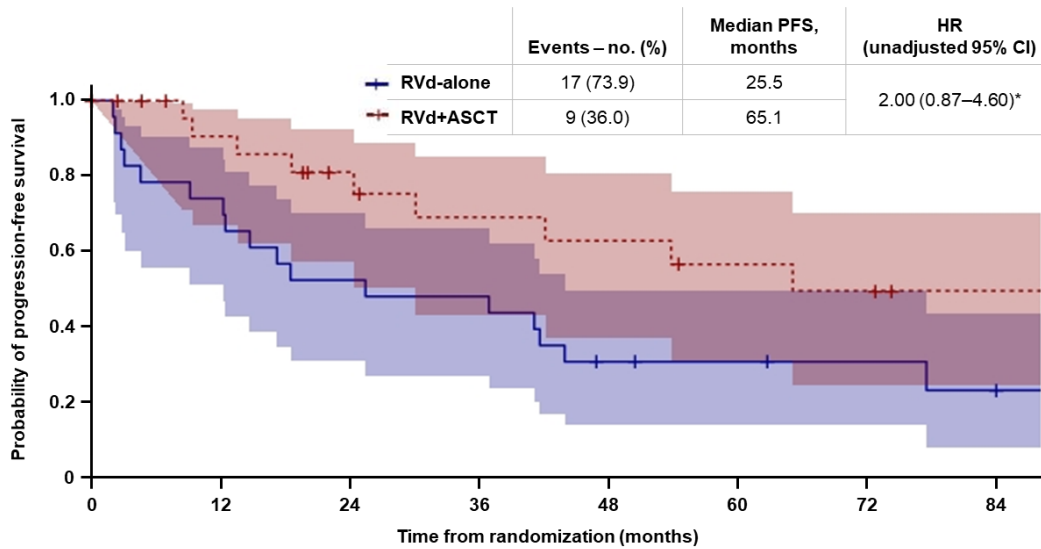

Patients at risk

|           |    |    |    |    |    |   |   |   |
|-----------|----|----|----|----|----|---|---|---|
| RVD-alone | 23 | 17 | 12 | 11 | 6  | 5 | 4 | 3 |
| RVD+ASCT  | 25 | 19 | 14 | 11 | 10 | 8 | 7 | 5 |

### Figure S5: Kaplan–Meier analysis of time to progression in the intent-to-treat population

There were 188 and 128 events of disease progression on the RVd-alone and RVd+ASCT arms, respectively, at data cut-off. ASCT, autologous stem cell transplantation. CI, confidence interval. HR, hazard ratio. RVd, lenalidomide, bortezomib, dexamethasone.

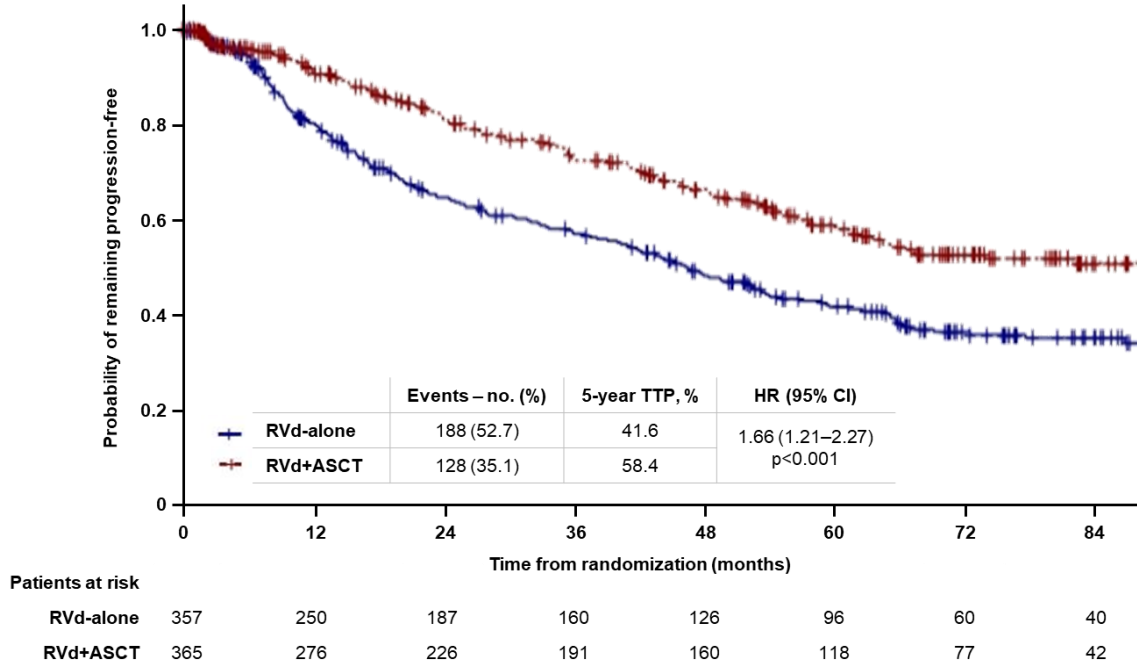

### Figure S6: Kaplan–Meier analysis of duration of response in responding patients

(A) Duration of partial response or better. (B) Duration of complete response or better. ASCT, autologous stem cell transplantation. CI, confidence interval. CR, complete response. DOR, duration of response. HR, hazard ratio. NR, not reached. PR, partial response. RVd, lenalidomide, bortezomib, dexamethasone.

**A**

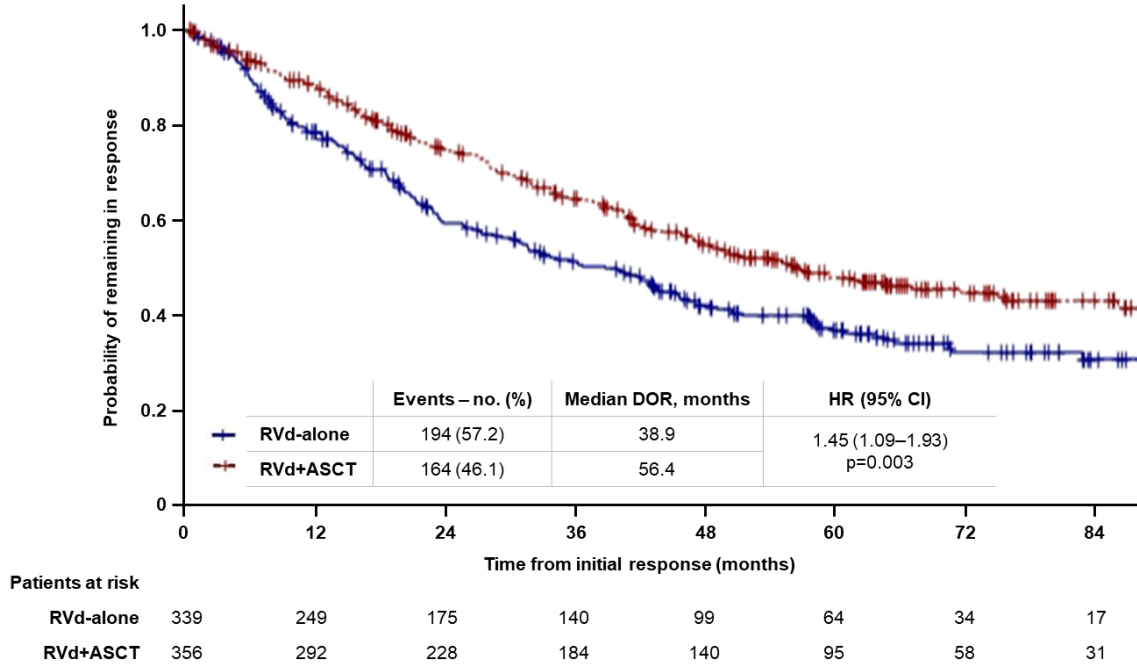

**B**

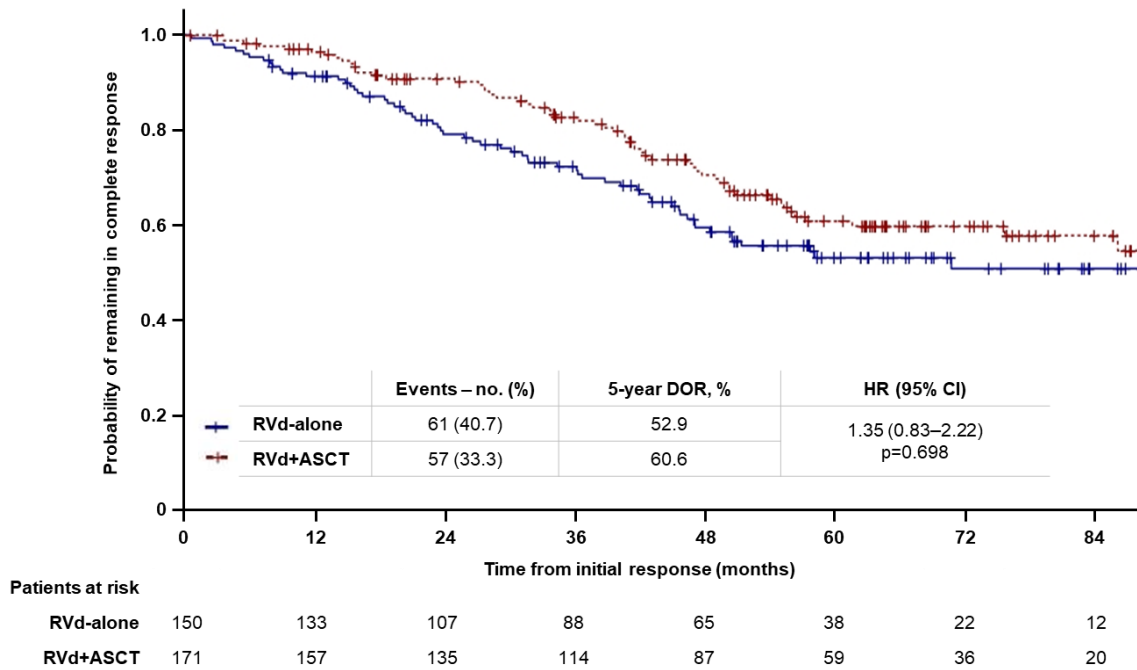

**Figure S7: Kaplan–Meier analysis of progression-free survival by MRD status from start of maintenance therapy**

ASCT, autologous stem cell transplantation. CI, confidence interval. HR, hazard ratio. MRD, minimal residual disease. PFS, progression-free survival. RVd, lenalidomide, bortezomib, dexamethasone. \*The widths of the CIs have not been adjusted for multiplicity, and so the intervals should not be used in place of a hypothesis test.

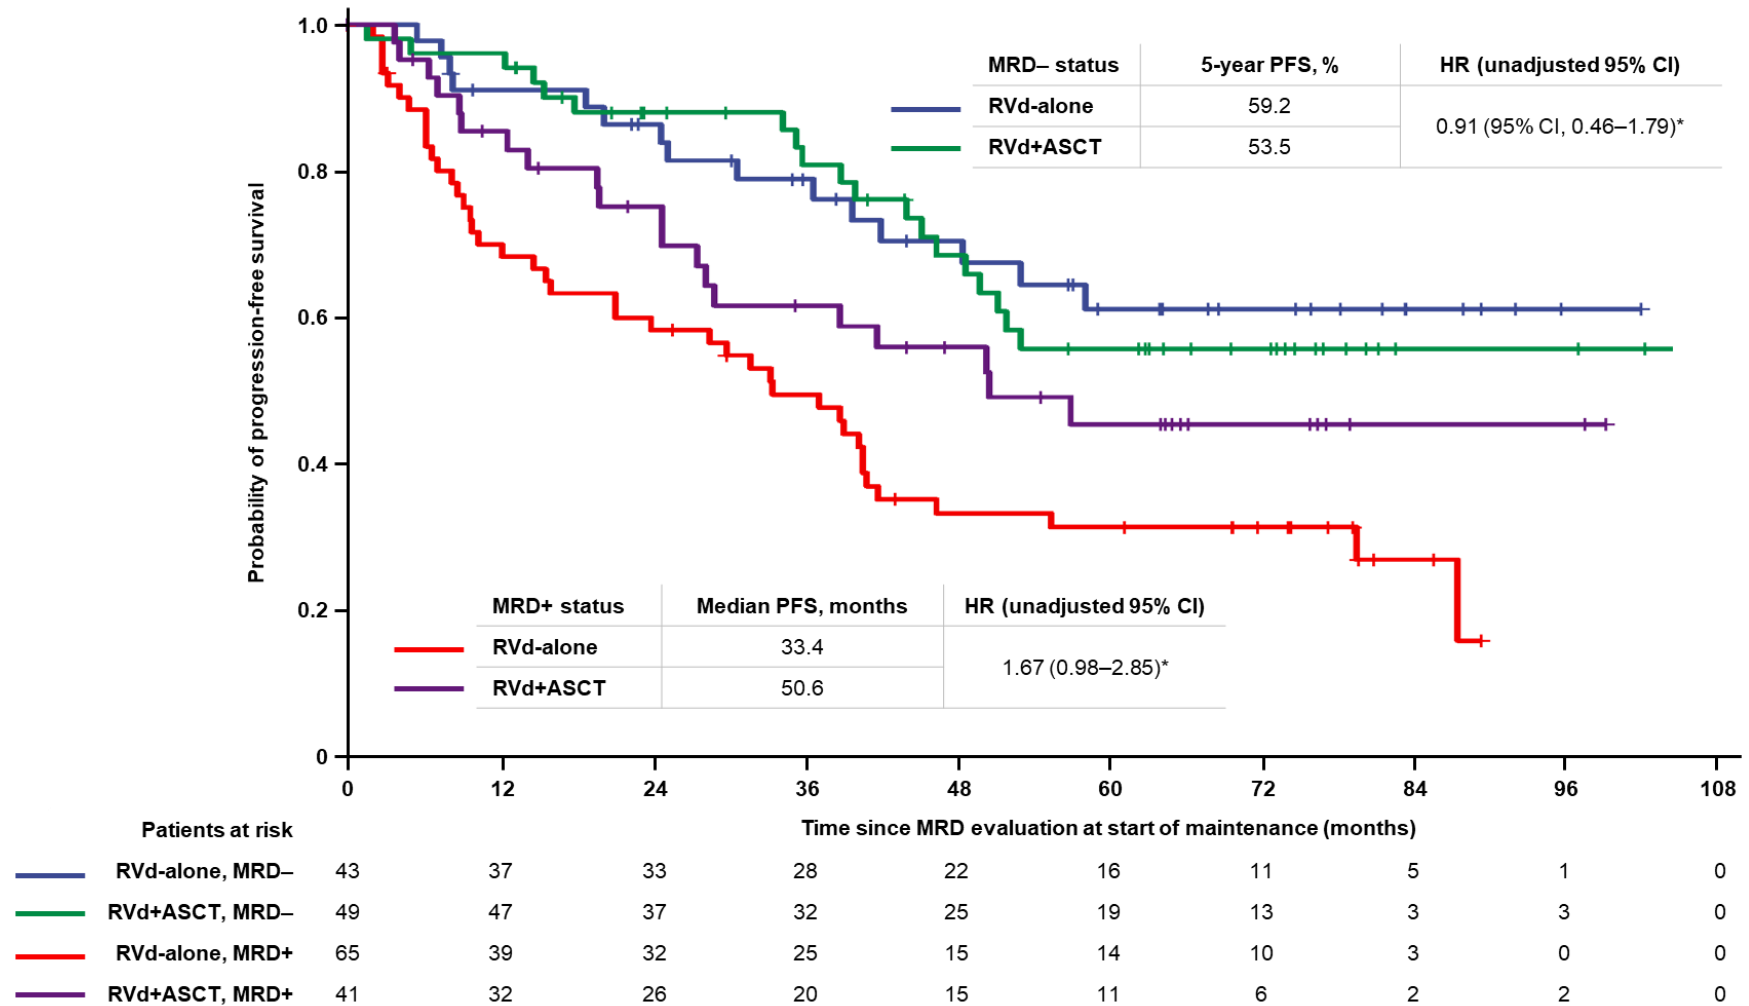

**Figure S8: Forest plot of overall survival, including subgroup analyses by stratification factors and other key baseline patient and disease characteristics.**

Overall survival with RVD-alone and RVD+ASCT in all patient subgroups analyzed. Subgroup data not shown for t(14;16) due to small event and patient numbers (3/10 vs 4/15, 5-year OS: 64.3% vs 71.4% ; HR 0.67, 95% CI: 0.11–4.07). The widths of the CIs have not been adjusted for multiplicity, and so the intervals should not be used in place of a hypothesis test. ASCT, autologous stem cell transplantation. CI, confidence interval. ECOG, Eastern Cooperative Oncology Group. HR, hazard ratio. Ig, immunoglobulin. ISS, International Staging System. ITT, intent-to-treat. NR, not reached. RVD, lenalidomide, bortezomib, dexamethasone.

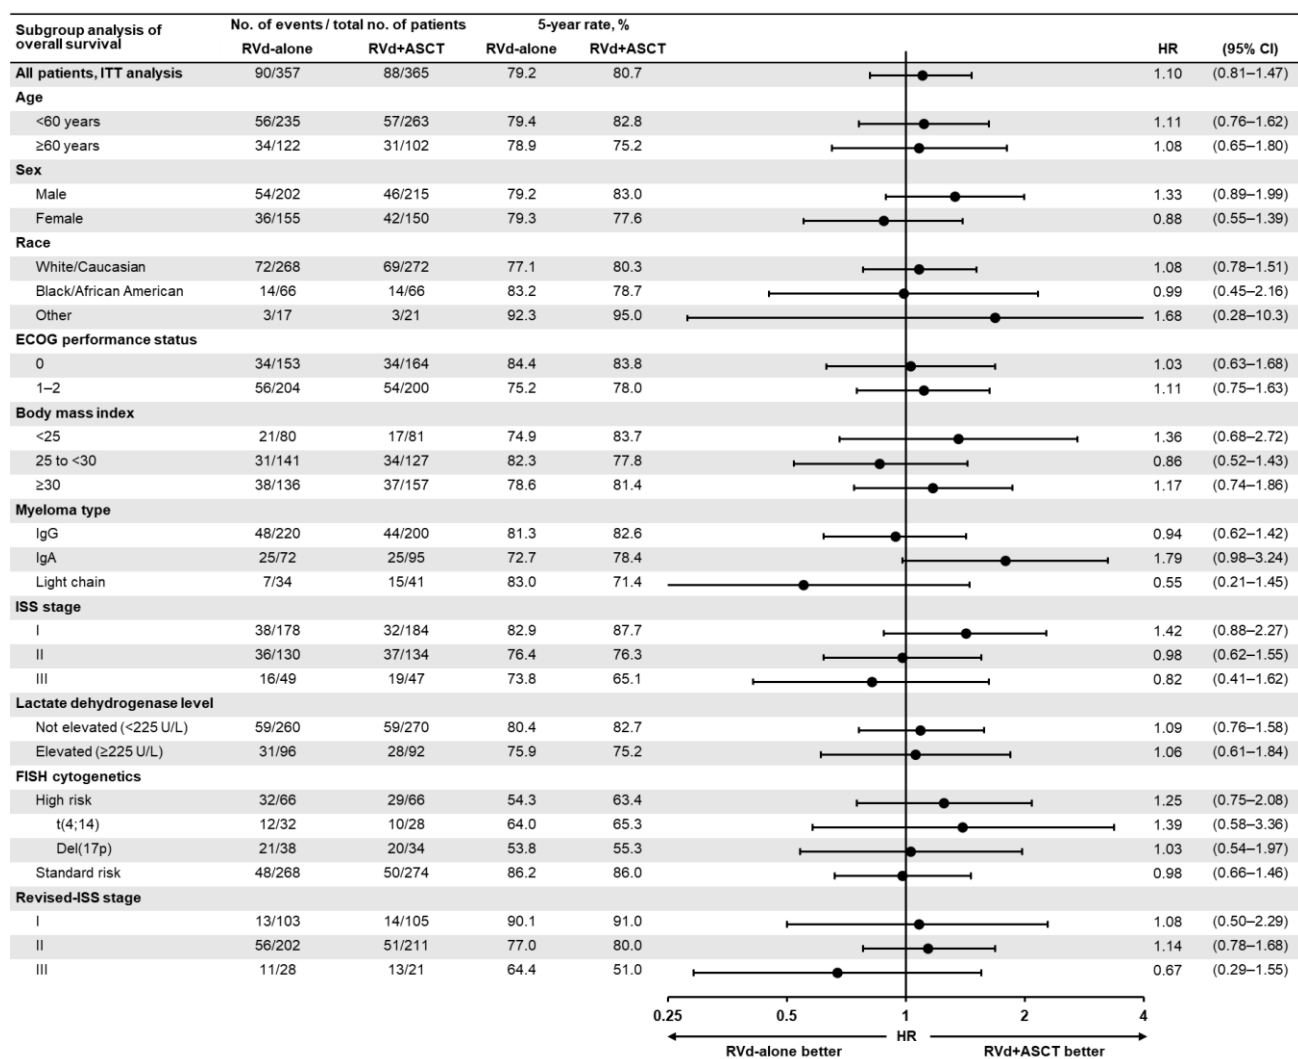

**Figure S9: Kaplan–Meier analyses of overall survival according to randomization stratification factors.**

Overall survival with RVd-alone and RVd+ASCT in patients with ISS stage (A) I, (B) II, and (C) III disease, and in patients with (D) high-risk, (E) standard-risk, and (F) non-evaluable cytogenetics. Shaded areas indicate 95% CIs. ASCT, autologous stem cell transplantation. CI, confidence interval. ISS, International Staging System. OS, overall survival. RVd, lenalidomide, bortezomib, dexamethasone. \*The widths of the CIs have not been adjusted for multiplicity, and so the intervals should not be used in place of a hypothesis test.

**A**

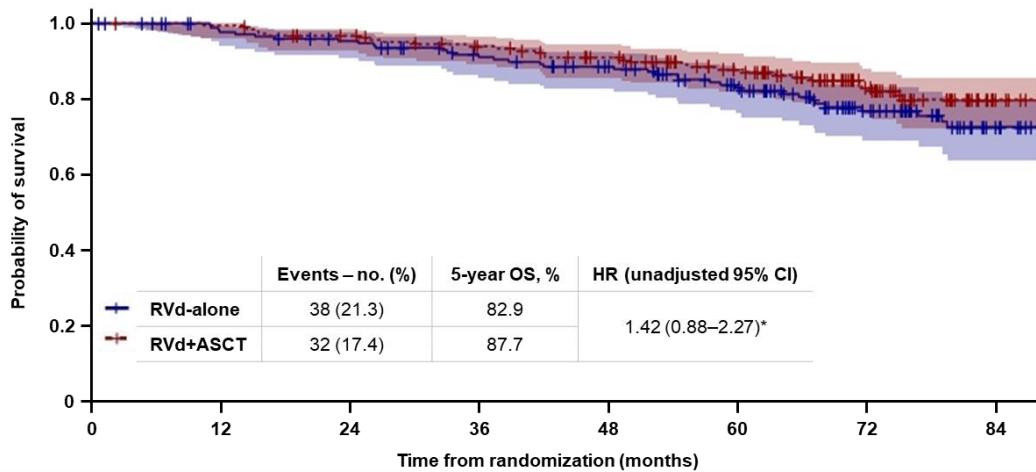

| Patients at risk |     | 0   | 12  | 24  | 36  | 48  | 60 | 72 | 84 |
|------------------|-----|-----|-----|-----|-----|-----|----|----|----|
| RVd-alone        | 178 | 166 | 159 | 145 | 134 | 110 | 72 | 41 |    |
| RVd+ASCT         | 184 | 182 | 172 | 161 | 149 | 127 | 89 | 47 |    |

**B**

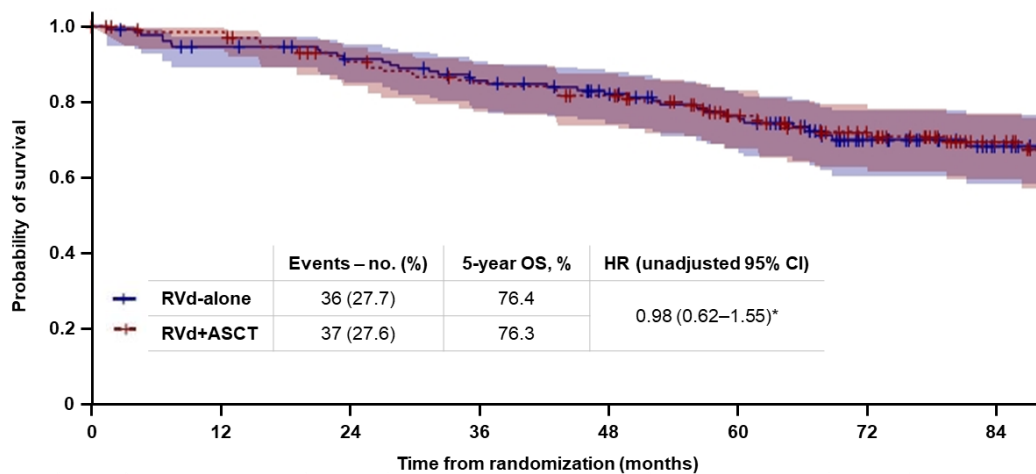

| Patients at risk |     | 0   | 12  | 24  | 36 | 48 | 60 | 72 | 84 |
|------------------|-----|-----|-----|-----|----|----|----|----|----|
| RVd-alone        | 130 | 120 | 112 | 102 | 91 | 78 | 52 | 35 |    |
| RVd+ASCT         | 134 | 128 | 113 | 104 | 98 | 77 | 58 | 37 |    |

**C**

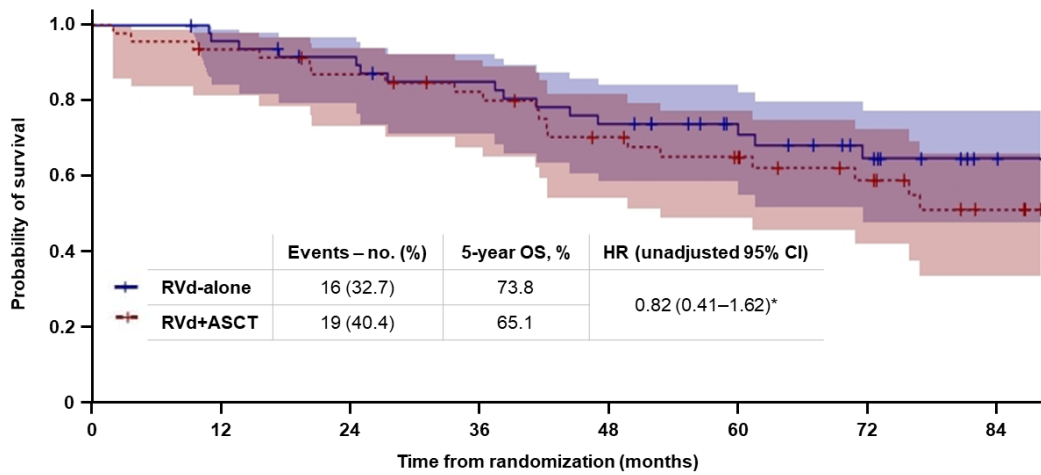

Patients at risk

|           |    |    |    |    |    |    |    |    |
|-----------|----|----|----|----|----|----|----|----|
| RVd-alone | 49 | 46 | 42 | 38 | 33 | 26 | 19 | 12 |
| RVd+ASCT  | 47 | 43 | 39 | 35 | 28 | 24 | 18 | 11 |

**D**

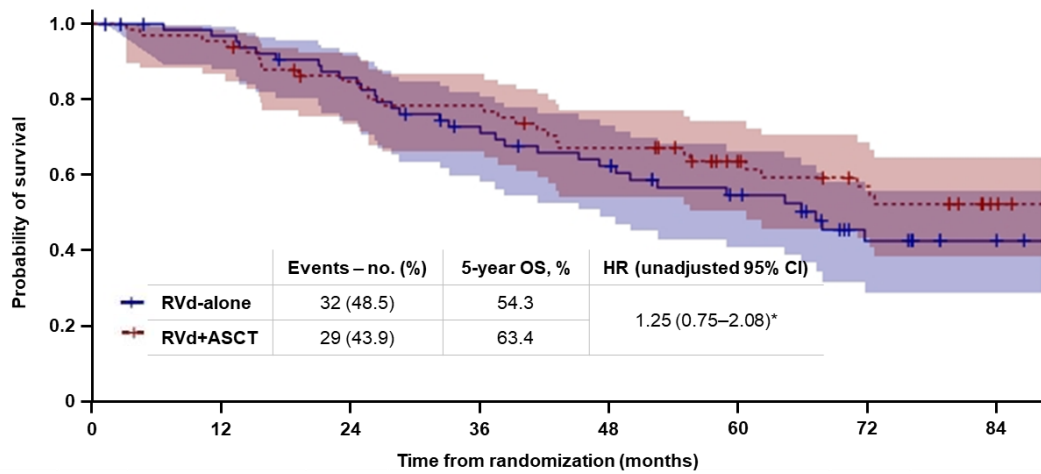

Patients at risk

|           |    |    |    |    |    |    |    |    |
|-----------|----|----|----|----|----|----|----|----|
| RVd-alone | 66 | 61 | 53 | 41 | 35 | 26 | 14 | 8  |
| RVd+ASCT  | 66 | 63 | 53 | 49 | 41 | 30 | 24 | 16 |

**E**

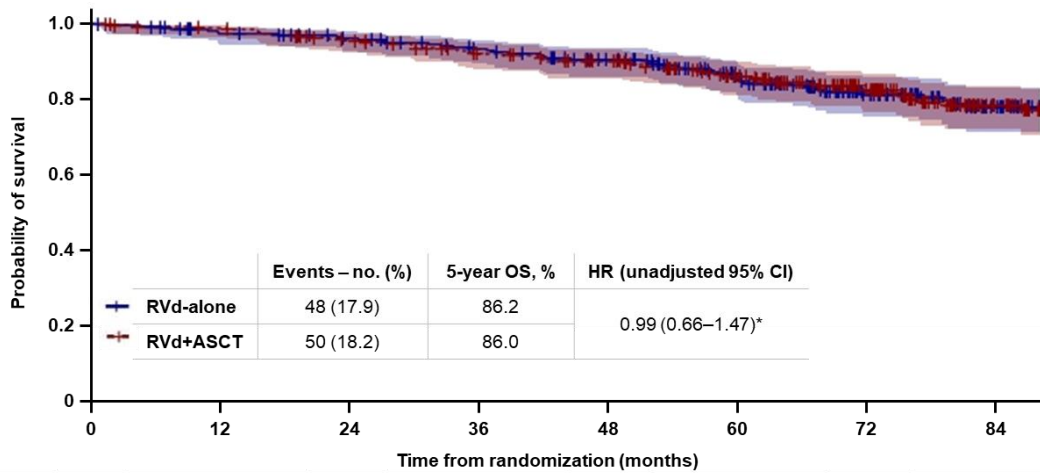

| Patients at risk |     | 0   | 12  | 24  | 36  | 48  | 60  | 72 | 84 |
|------------------|-----|-----|-----|-----|-----|-----|-----|----|----|
| RVd-alone        | 268 | 252 | 241 | 226 | 207 | 175 | 121 | 74 |    |
| RVd+ASCT         | 274 | 266 | 250 | 231 | 216 | 184 | 131 | 71 |    |

**F**

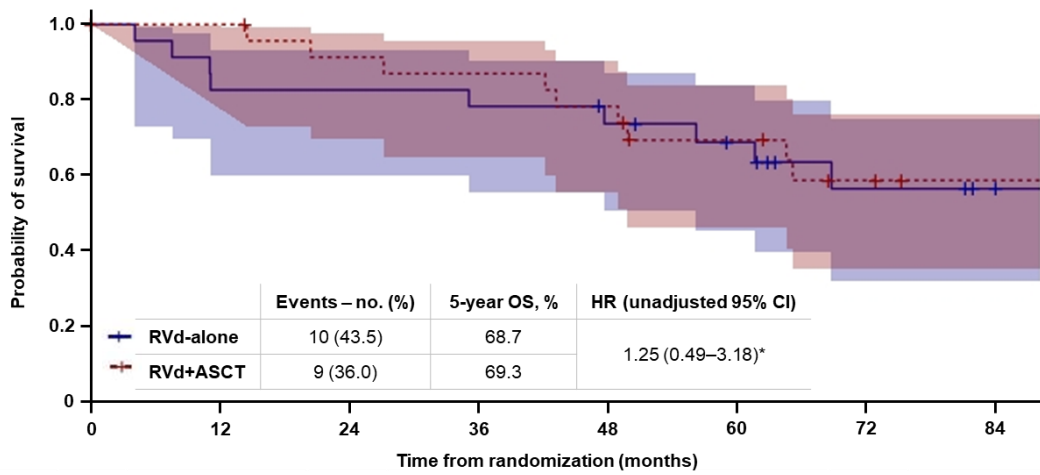

| Patients at risk |    | 0  | 12 | 24 | 36 | 48 | 60 | 72 | 84 |
|------------------|----|----|----|----|----|----|----|----|----|
| RVd-alone        | 23 | 19 | 19 | 18 | 16 | 13 | 8  | 6  |    |
| RVd+ASCT         | 25 | 24 | 21 | 20 | 18 | 14 | 10 | 8  |    |



**Figure S10: Cumulative incidence of second primary malignancies in DETERMINATION, with comparison of 5-year cumulative incidence vs IFM 2009**

Cumulative incidence analysis with death as a competing risk for (A) any second primary malignancy, (B) any invasive second primary malignancy, (C) any second primary hematologic malignancy, (D) any second primary solid tumor, and (E) any non-melanoma skin second primary malignancy in the RVd-alone (blue lines) and RVd+ASCT (green lines) arms. ASCT, autologous stem cell transplantation. RVd, lenalidomide, bortezomib, dexamethasone. In the IFM 2009 study (N=350 in both arms),<sup>4,5</sup> after median follow-up of 93.0 months on the RVd-alone arm and 93.6 months on RVd+ASCT arm, the 5-year cumulative incidence of invasive second primary malignancies was 5.56% vs 6.91%, and the 5-year cumulative incidence of second primary hematologic malignancies was 0.58% vs 1.44%, respectively [Perrot A, personal communication].

**A**

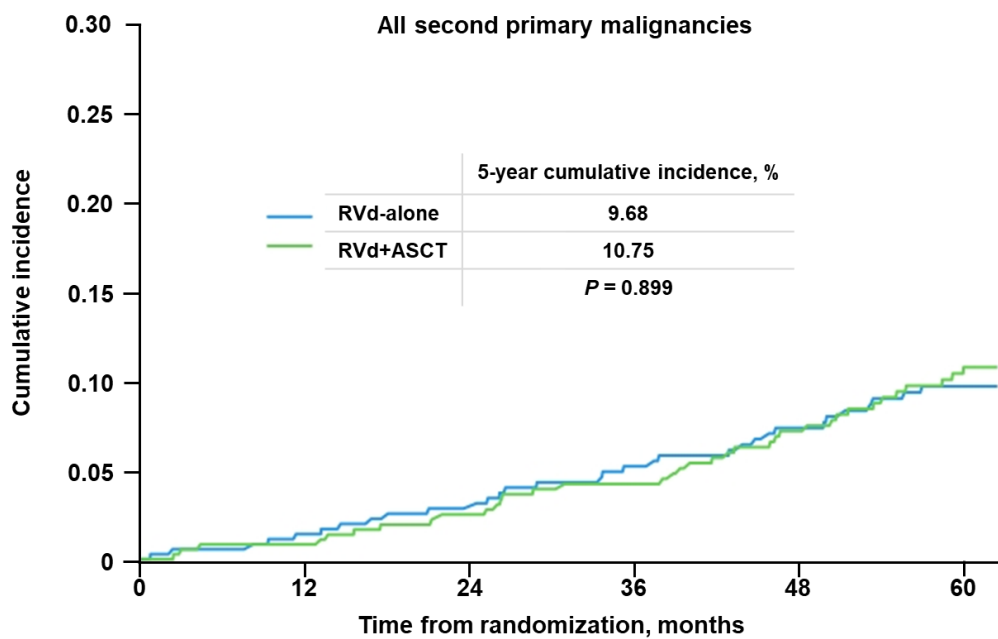

**B**

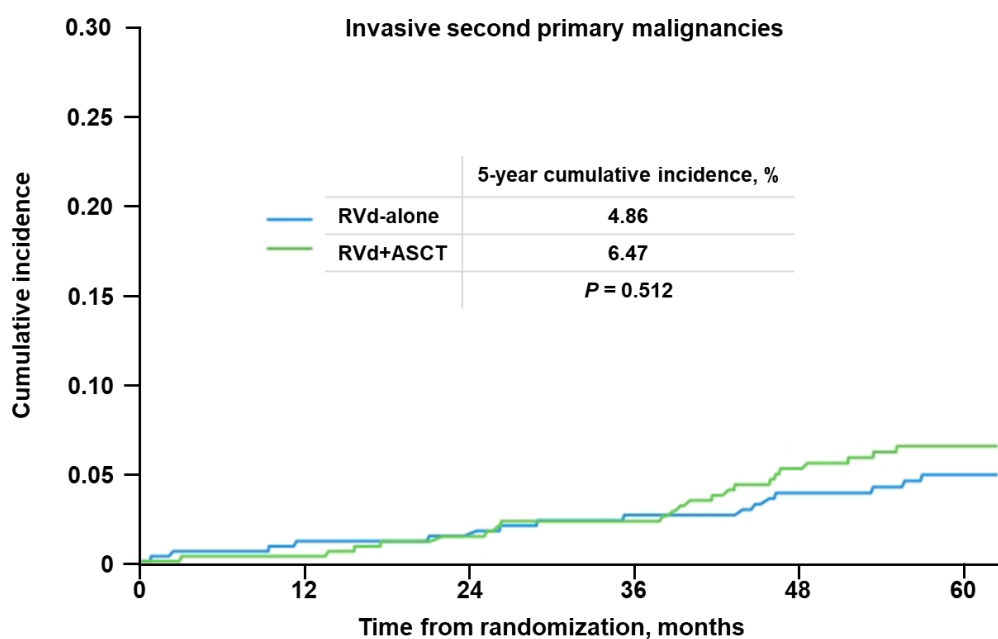

C

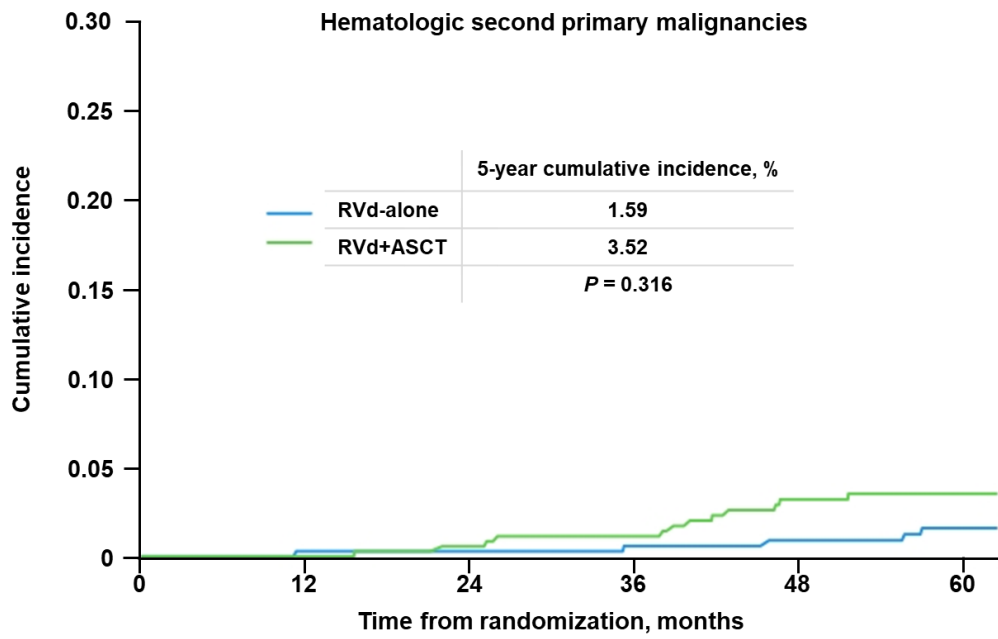

D

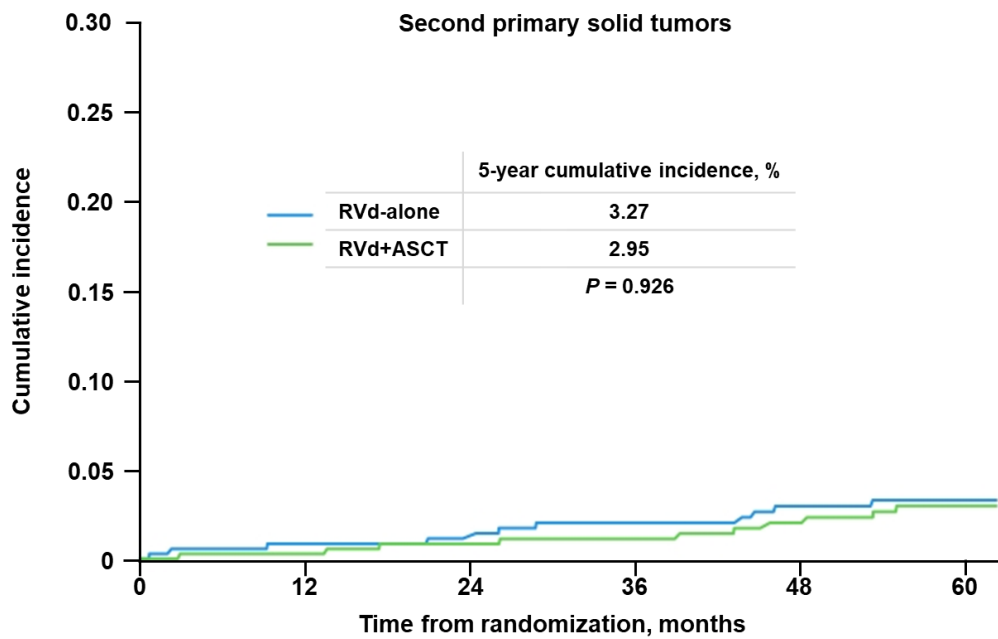

F

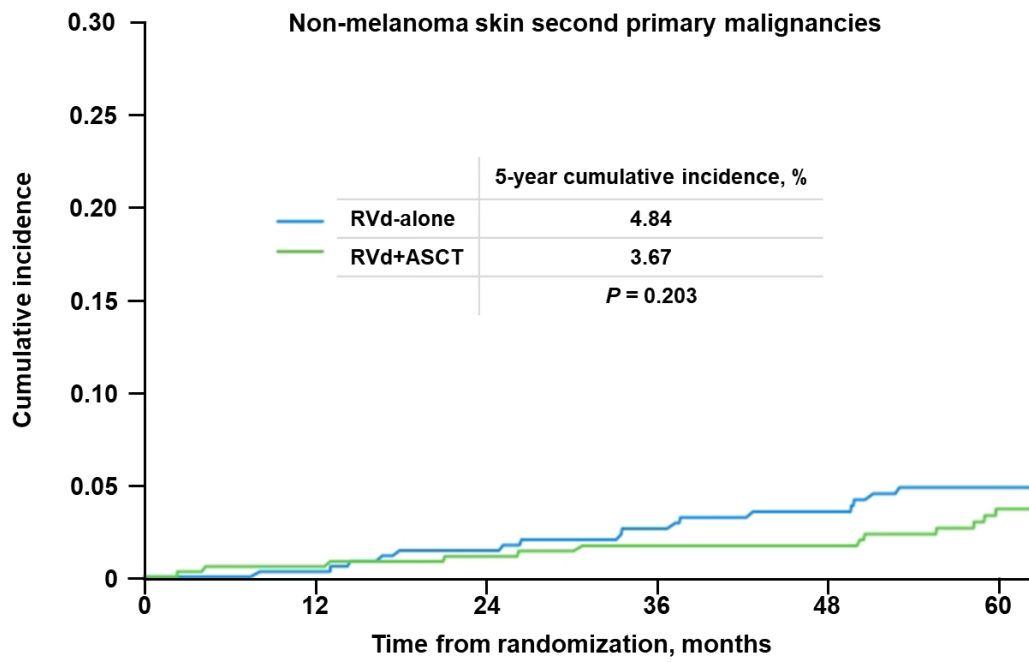

## Figure S11: Mean quality of life domain scores at baseline and on-treatment assessment timepoints

Panels show the mean domain scores among patients completing the respective instruments at each timepoint for the (A) Global Health Status/QoL, (B) Physical Functioning, and (C) Role Functioning domains of the EORTC QLQ-C30 instrument, the (D) Disease Symptoms and (E) Side Effects scores of the EORTC QLQ-MY20 instrument, and (F) the FACT/GOG-NTx instrument neurotoxicity score. Changes in domain scores from baseline were compared between groups using a two-sided t-test, with Bonferroni correction to adjust for seven multiple comparisons over the time points. ASCT, autologous stem cell transplantation. C30, core 30 module. EORTC, European Organization for the Research and Treatment of Cancer. FACT, Functional Assessment of Cancer Therapy. GOG, Gynecologic Oncology Group. MY20, myeloma-specific module. Ntx, neurotoxicity. QLQ, quality of life questionnaire. QoL, quality of life. RVd, lenalidomide, bortezomib, dexamethasone.

**A**

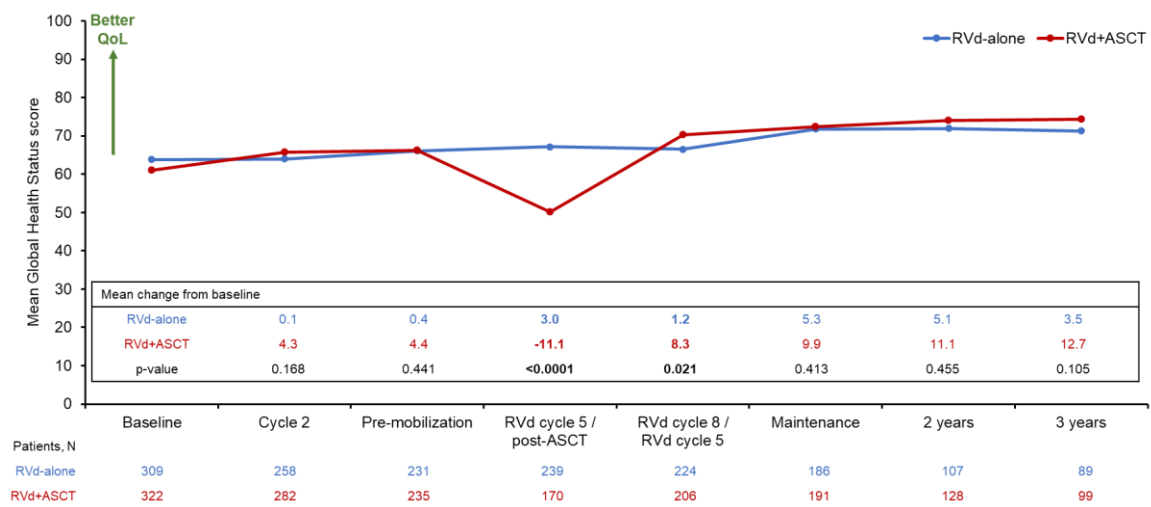

**B**

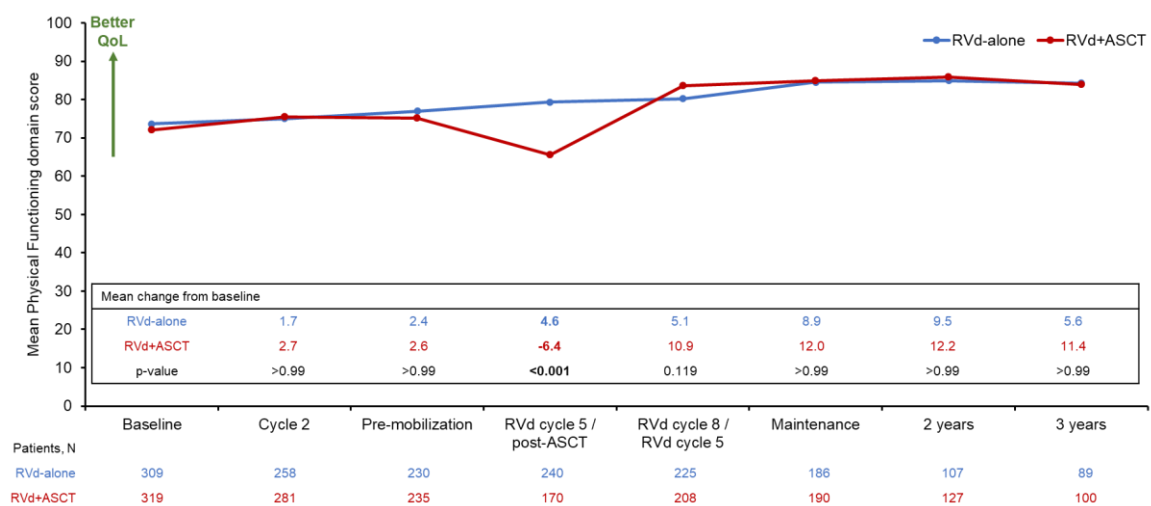

C

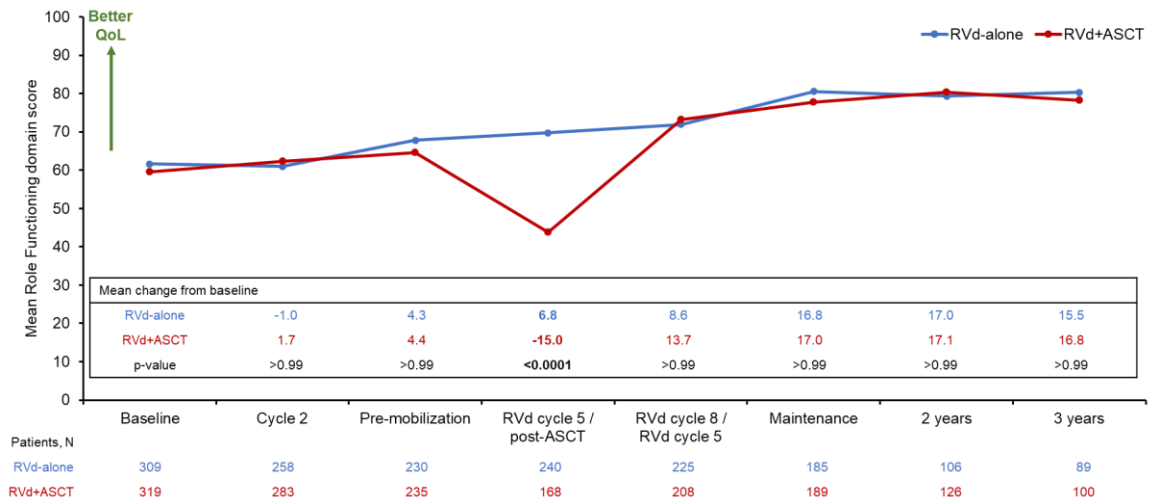

D

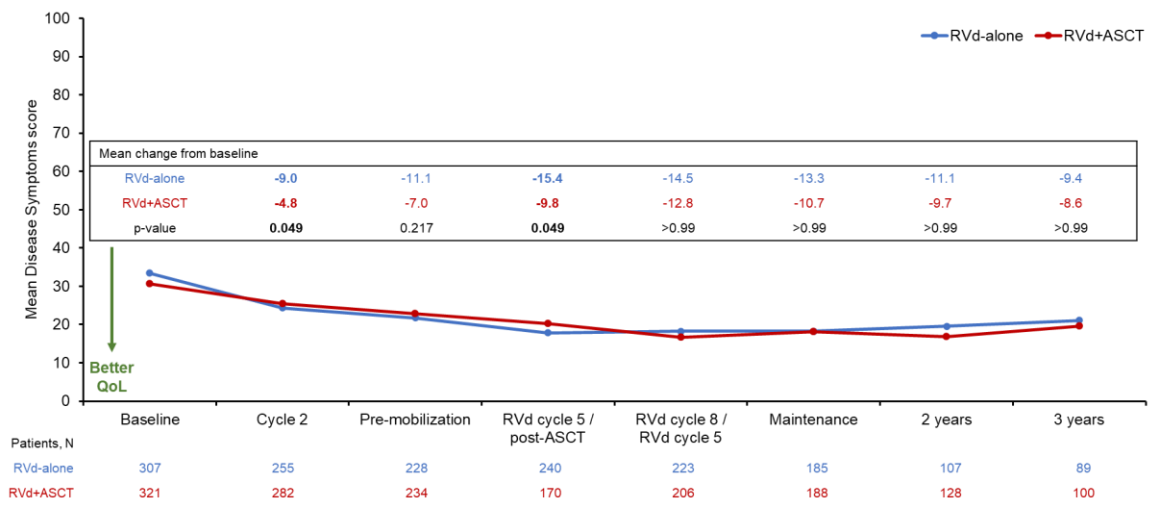

E

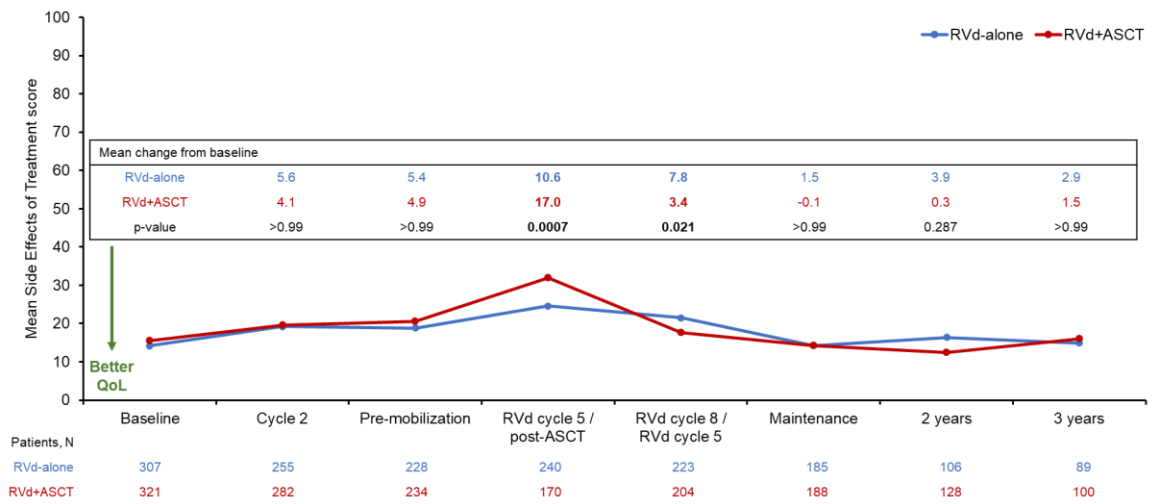

F

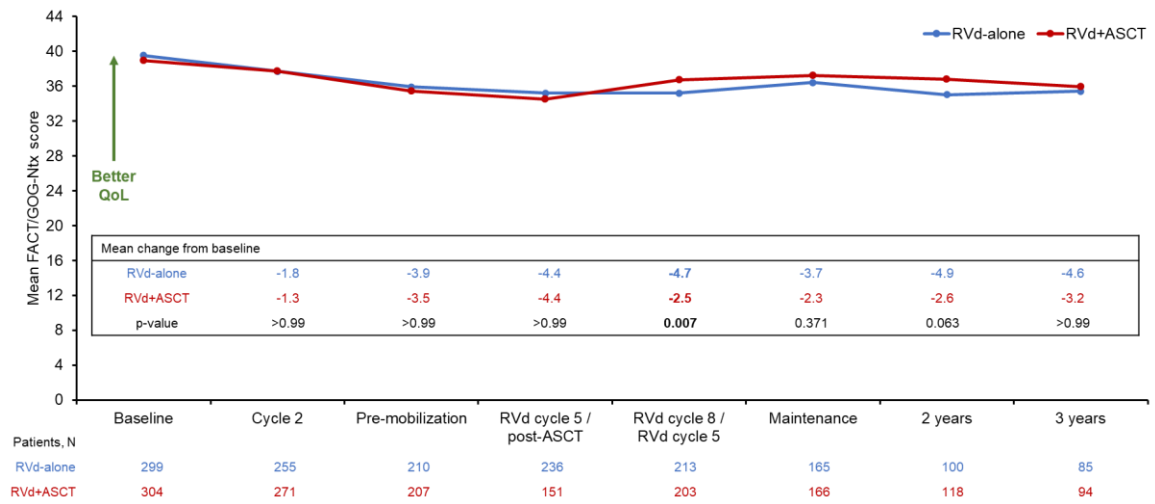

### Figure S12: Kaplan–Meier analysis of event-free survival in the intent-to-treat population

Event-free survival included receipt of non-protocol therapy, disease progression, and death as events. ASCT, autologous stem cell transplantation. This post-hoc sensitivity analysis was conducted to evaluate the impact of censoring for non-protocol therapy in the PFS analysis. CI, confidence interval. EFS, event-free survival. HR, hazard ratio. RVd, lenalidomide, bortezomib, dexamethasone.

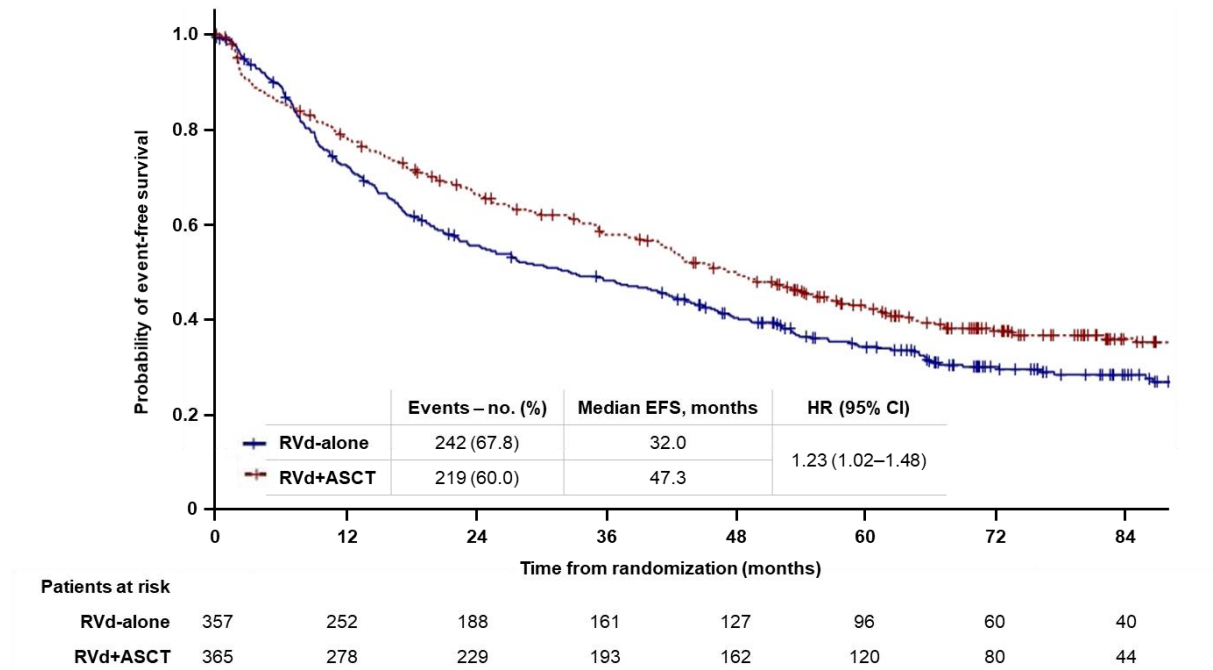

**Table S1: Eligibility criteria – hematologic, hepatic, renal, and cardiac parameters.**

All laboratory assessments were required to be performed within 21 days of initiating protocol therapy

| Organ/system       | Parameter                 | Exclusion criterion                                                                                                                                                                                                                                                                                 |
|--------------------|---------------------------|-----------------------------------------------------------------------------------------------------------------------------------------------------------------------------------------------------------------------------------------------------------------------------------------------------|
| <b>Hematologic</b> | Platelet count            | <50,000/mm <sup>3</sup> for patients in whom <50% of bone marrow nucleated cells are plasma cells                                                                                                                                                                                                   |
|                    |                           | <30,000/mm <sup>3</sup> for patients in whom >50% of bone marrow nucleated cells are plasma cells                                                                                                                                                                                                   |
|                    | Absolute neutrophil count | <1000/mm <sup>3</sup>                                                                                                                                                                                                                                                                               |
|                    | Hemoglobin                | <8 g/dL                                                                                                                                                                                                                                                                                             |
| <b>Hepatic</b>     | Total bilirubin           | >1.5 x ULN                                                                                                                                                                                                                                                                                          |
|                    | AST                       | ≥2 x ULN                                                                                                                                                                                                                                                                                            |
|                    | ALT                       | ≥2 x ULN                                                                                                                                                                                                                                                                                            |
|                    | Alkaline phosphatase      | ≥2 x ULN                                                                                                                                                                                                                                                                                            |
| <b>Renal</b>       | Serum creatinine          | >2.0 mg/dL within 7 days of initiating protocol therapy                                                                                                                                                                                                                                             |
|                    | Creatinine clearance      | <50 mL/min (actual or calculated) within 7 days of initiating protocol therapy                                                                                                                                                                                                                      |
| <b>Cardiac</b>     | LVEF                      | <40%                                                                                                                                                                                                                                                                                                |
|                    | –                         | Clinical signs of heart or coronary failure<br>Myocardial infarction within prior 6 months<br>NYHA Class III or IV heart failure<br>Uncontrolled angina<br>Severe uncontrolled ventricular arrhythmias<br>Electrocardiographic evidence of acute ischemia or active conductive system abnormalities |

ALT, alanine aminotransferase; AST, aspartate aminotransferase; LVEF, left ventricular ejection fraction; NYHA, New York Heart Association; ULN, institutional upper limit of normal



**Table S2: Treatment-related adverse events of any grade reported during treatment (induction through maintenance) in at least 2% of RVd-alone or RVd+ASCT patients**

| Event – no. (%)                                             | RVd-alone (N = 357) | RVd+ASCT (N = 365) |
|-------------------------------------------------------------|---------------------|--------------------|
| <b>Any event</b>                                            | 344 (96.4)          | 359 (98.4)         |
| <b>Any hematologic event</b>                                | 230 (64.4)          | 331 (90.7)         |
| <b>Blood and lymphatic system disorders</b>                 | 234 (65.5)          | 331 (90.7)         |
| Neutropenia                                                 | 162 (45.4)          | 316 (86.6)         |
| Thrombocytopenia                                            | 90 (25.2)           | 305 (83.6)         |
| Leukopenia                                                  | 94 (26.3)           | 171 (46.8)         |
| Anemia                                                      | 90 (25.2)           | 137 (37.5)         |
| Lymphopenia                                                 | 41 (11.5)           | 47 (12.9)          |
| Febrile neutropenia                                         | 15 (4.2)            | 37 (10.1)          |
| <b>Cardiac disorders</b>                                    | 44 (12.3)           | 60 (16.4)          |
| Bradycardia                                                 | 20 (5.6)            | 17 (4.7)           |
| Sinus bradycardia                                           | 11 (3.1)            | 10 (2.7)           |
| Tachycardia                                                 | 5 (1.4)             | 16 (4.4)           |
| <b>Ear and labyrinth disorders</b>                          | 21 (5.9)            | 19 (5.2)           |
| Tinnitus                                                    | 8 (2.2)             | 9 (2.5)            |
| <b>Eye disorders</b>                                        | 79 (22.1)           | 49 (13.4)          |
| Blurred vision                                              | 51 (14.3)           | 25 (6.8)           |
| Dry eyes                                                    | 18 (5.0)            | 13 (3.6)           |
| <b>Gastrointestinal disorders</b>                           | 262 (73.4)          | 293 (80.3)         |
| Diarrhea                                                    | 169 (47.3)          | 225 (61.6)         |
| Nausea                                                      | 123 (34.5)          | 191 (52.3)         |
| Constipation                                                | 143 (40.1)          | 142 (38.9)         |
| Vomiting                                                    | 31 (8.7)            | 99 (27.1)          |
| Mucositis                                                   | 12 (3.4)            | 73 (20.0)          |
| Stomach pain                                                | 31 (8.7)            | 50 (13.7)          |
| Dyspepsia                                                   | 25 (7.0)            | 32 (8.8)           |
| Abdominal distension                                        | 23 (6.4)            | 21 (5.8)           |
| Dry mouth                                                   | 18 (5.0)            | 22 (6.0)           |
| Esophagitis                                                 | 2 (0.6)             | 27 (7.4)           |
| Loose stools                                                | 8 (2.2)             | 19 (5.2)           |
| Heartburn                                                   | 13 (3.6)            | 11 (3.0)           |
| Flatulence                                                  | 8 (2.2)             | 15 (4.1)           |
| Abdominal discomfort                                        | 3 (0.8)             | 14 (3.8)           |
| Acid reflux                                                 | 9 (2.5)             | 6 (1.6)            |
| Gastroesophageal reflux disease                             | 2 (0.6)             | 13 (3.6)           |
| <b>General disorders and administration site conditions</b> | 267 (74.8)          | 280 (76.7)         |
| Fatigue                                                     | 203 (56.9)          | 218 (59.7)         |
| Edema                                                       | 123 (34.5)          | 109 (29.9)         |
| Fever                                                       | 46 (12.9)           | 85 (23.3)          |
| Pain                                                        | 35 (9.8)            | 36 (9.9)           |

| <b>Event – no. (%)</b>                                 | <b>RVd-alone (N = 357)</b> | <b>RVd+ASCT (N = 365)</b> |
|--------------------------------------------------------|----------------------------|---------------------------|
| Flu like symptoms                                      | 16 (4.5)                   | 19 (5.2)                  |
| Malaise                                                | 17 (4.8)                   | 15 (4.1)                  |
| Chest pain                                             | 10 (2.8)                   | 19 (5.2)                  |
| Chills                                                 | 8 (2.2)                    | 21 (5.8)                  |
| Mucositis                                              | 2 (0.6)                    | 21 (5.8)                  |
| Weakness                                               | 8 (2.2)                    | 13 (3.6)                  |
| Irritability                                           | 11 (3.1)                   | 5 (1.4)                   |
| <b>Infections and infestations</b>                     | <b>170 (47.6)</b>          | <b>185 (50.7)</b>         |
| Upper respiratory infection                            | 108 (30.3)                 | 118 (32.3)                |
| Pneumonia                                              | 37 (10.4)                  | 61 (16.7)                 |
| Cold                                                   | 23 (6.4)                   | 29 (7.9)                  |
| Sinusitis                                              | 17 (4.8)                   | 19 (5.2)                  |
| Stye                                                   | 17 (4.8)                   | 9 (2.5)                   |
| Urinary tract infection                                | 13 (3.6)                   | 12 (3.3)                  |
| Herpes zoster                                          | 7 (2.0)                    | 13 (3.6)                  |
| Influenza                                              | 8 (2.2)                    | 10 (2.7)                  |
| Cellulitis                                             | 5 (1.4)                    | 10 (2.7)                  |
| Thrush                                                 | 3 (0.8)                    | 12 (3.3)                  |
| <b>Injury, poisoning and procedural complications</b>  | <b>16 (4.5)</b>            | <b>25 (6.8)</b>           |
| Bruising                                               | 6 (1.7)                    | 13 (3.6)                  |
| <b>Investigations</b>                                  | <b>93 (26.1)</b>           | <b>92 (25.2)</b>          |
| Elevated liver enzymes                                 | 33 (9.2)                   | 38 (10.4)                 |
| Weight loss                                            | 18 (5.0)                   | 15 (4.1)                  |
| Weight gain                                            | 22 (6.2)                   | 7 (1.9)                   |
| Creatinine increased                                   | 13 (3.6)                   | 13 (3.6)                  |
| Blood bilirubin increased                              | 10 (2.8)                   | 8 (2.2)                   |
| <b>Metabolism and nutrition disorders</b>              | <b>166 (46.5)</b>          | <b>185 (50.7)</b>         |
| Hypokalemia                                            | 55 (15.4)                  | 62 (17.0)                 |
| Anorexia                                               | 43 (12.0)                  | 65 (17.8)                 |
| Hypophosphatemia                                       | 48 (13.4)                  | 50 (13.7)                 |
| Hyperglycemia                                          | 38 (10.6)                  | 33 (9.0)                  |
| Hypocalcemia                                           | 25 (7.0)                   | 30 (8.2)                  |
| Hypomagnesemia                                         | 22 (6.2)                   | 26 (7.1)                  |
| Hyponatremia                                           | 19 (5.3)                   | 25 (6.8)                  |
| Dehydration                                            | 11 (3.1)                   | 16 (4.4)                  |
| Decreased appetite                                     | 12 (3.4)                   | 14 (3.8)                  |
| Hypoalbuminemia                                        | 8 (2.2)                    | 10 (2.7)                  |
| <b>Musculoskeletal and connective tissue disorders</b> | <b>154 (43.1)</b>          | <b>169 (46.3)</b>         |
| Cramps                                                 | 34 (9.5)                   | 34 (9.3)                  |
| Myalgia                                                | 33 (9.2)                   | 29 (7.9)                  |
| Muscle cramps                                          | 31 (8.7)                   | 29 (7.9)                  |
| Bone pain                                              | 25 (7.0)                   | 29 (7.9)                  |

| <b>Event – no. (%)</b>                                 | <b>RVd-alone (N = 357)</b> | <b>RVd+ASCT (N = 365)</b> |
|--------------------------------------------------------|----------------------------|---------------------------|
| Arthralgia                                             | 16 (4.5)                   | 30 (8.2)                  |
| Back pain                                              | 19 (5.3)                   | 23 (6.3)                  |
| Muscle weakness                                        | 8 (2.2)                    | 17 (4.7)                  |
| Pain in extremity                                      | 17 (4.8)                   | 6 (1.6)                   |
| Pain in legs                                           | 6 (1.7)                    | 15 (4.1)                  |
| Leg cramps                                             | 7 (2.0)                    | 10 (2.7)                  |
| Muscle spasm                                           | 6 (1.7)                    | 10 (2.7)                  |
| Pain in shoulder                                       | 8 (2.2)                    | 8 (2.2)                   |
| <b>Nervous system disorders</b>                        | <b>291 (81.5)</b>          | <b>273 (74.8)</b>         |
| Neuropathy <sup>†</sup>                                | 261 (73.1)                 | 241 (66.0)                |
| Sensory peripheral neuropathy                          | 236 (66.1)                 | 219 (60.0)                |
| Dizziness                                              | 55 (15.4)                  | 58 (15.9)                 |
| Headache                                               | 44 (12.3)                  | 52 (14.2)                 |
| Neuropathy                                             | 49 (13.7)                  | 37 (10.1)                 |
| Dysgeusia                                              | 43 (12.0)                  | 42 (11.5)                 |
| Paresthesia                                            | 41 (11.5)                  | 33 (9.0)                  |
| Tremor                                                 | 27 (7.6)                   | 23 (6.3)                  |
| Memory impairment                                      | 22 (6.2)                   | 23 (6.3)                  |
| Light headedness                                       | 14 (3.9)                   | 12 (3.3)                  |
| Syncope                                                | 10 (2.8)                   | 10 (2.7)                  |
| Numbness of extremities                                | 7 (2.0)                    | 8 (2.2)                   |
| <b>Respiratory, thoracic and mediastinal disorders</b> | <b>122 (34.2)</b>          | <b>130 (35.6)</b>         |
| Dyspnea                                                | 57 (16.0)                  | 59 (16.2)                 |
| Cough                                                  | 52 (14.6)                  | 54 (14.8)                 |
| Nasal congestion                                       | 18 (5.0)                   | 20 (5.5)                  |
| Sore throat                                            | 13 (3.6)                   | 20 (5.5)                  |
| Hiccups                                                | 11 (3.1)                   | 14 (3.8)                  |
| <b>Skin and subcutaneous tissue disorders</b>          | <b>157 (44.0)</b>          | <b>175 (47.9)</b>         |
| Maculo-papular rash                                    | 87 (24.4)                  | 96 (26.3)                 |
| Dry skin                                               | 36 (10.1)                  | 34 (9.3)                  |
| Alopecia                                               | 48 (13.4)                  | 17 (4.7)                  |
| Pruritis                                               | 15 (4.2)                   | 26 (7.1)                  |
| Rash pruritic                                          | 5 (1.4)                    | 12 (3.3)                  |
| Night sweats                                           | 6 (1.7)                    | 10 (2.7)                  |
| <b>Vascular disorders</b>                              | <b>75 (21.0)</b>           | <b>109 (29.9)</b>         |
| All thromboembolic events <sup>‡</sup>                 | 25 (7.0)                   | 40 (11.0)                 |
| Thromboembolic event                                   | 12 (3.4)                   | 23 (6.3)                  |
| Deep vein thrombosis                                   | 9 (2.5)                    | 9 (2.5)                   |
| Hypertension                                           | 25 (7.0)                   | 24 (6.6)                  |
| Hypotension                                            | 15 (4.2)                   | 33 (9.0)                  |
| Hot flashes                                            | 12 (3.4)                   | 15 (4.1)                  |

†Neuropathy events include sensory peripheral neuropathy, sensory neuropathy, and neuropathy. ‡All thromboembolic events include pulmonary embolism, thromboembolic event, stroke, and deep vein thrombosis. ASCT, autologous stem cell transplantation. RVd, lenalidomide, bortezomib, dexamethasone.

**Table S3: Treatment-related adverse events (any grade and grade 3 or higher) reported during maintenance in at least 2% of patients receiving maintenance in either arm**

| Event – no. (%)                                             | RVd-alone<br>(N = 291) | RVd+ASCT<br>(N = 289) |
|-------------------------------------------------------------|------------------------|-----------------------|
| <b>Any-grade events</b>                                     |                        |                       |
| <b>Any event</b>                                            | 244 (83.8)             | 242 (83.7)            |
| <b>Any hematologic event</b>                                | 110 (37.8)             | 149 (51.6)            |
| <b>Blood and lymphatic system disorders</b>                 | 110 (37.8)             | 150 (51.9)            |
| Neutropenia                                                 | 88 (30.2)              | 124 (42.9)            |
| Leukopenia                                                  | 37 (12.7)              | 57 (19.7)             |
| Thrombocytopenia                                            | 15 (5.2)               | 53 (18.3)             |
| Anemia                                                      | 21 (7.2)               | 28 (9.7)              |
| <b>Cardiac disorders</b>                                    | 27 (9.3)               | 29 (10.0)             |
| Bradycardia                                                 | 19 (6.5)               | 16 (5.5)              |
| Sinus bradycardia                                           | 6 (2.1)                | 9 (3.1)               |
| <b>Eye disorders</b>                                        | 23 (7.9)               | 15 (5.2)              |
| Blurred vision                                              | 9 (3.1)                | 5 (1.7)               |
| <b>Gastrointestinal disorders</b>                           | 161 (55.3)             | 160 (55.4)            |
| Diarrhea                                                    | 121 (41.6)             | 126 (43.6)            |
| Nausea                                                      | 39 (13.4)              | 42 (14.5)             |
| Constipation                                                | 44 (15.1)              | 34 (11.8)             |
| Vomiting                                                    | 15 (5.2)               | 25 (8.7)              |
| Stomach pain                                                | 18 (6.2)               | 14 (4.8)              |
| Dyspepsia                                                   | 8 (2.7)                | 10 (3.5)              |
| Abdominal distension                                        | 6 (2.1)                | 9 (3.1)               |
| Dry mouth                                                   | 10 (3.4)               | 5 (1.7)               |
| Flatulence                                                  | 5 (1.7)                | 7 (2.4)               |
| <b>General disorders and administration site conditions</b> | 132 (45.4)             | 140 (48.4)            |
| Fatigue                                                     | 94 (32.3)              | 104 (36.0)            |
| Edema                                                       | 35 (12.0)              | 28 (9.7)              |
| Fever                                                       | 16 (5.5)               | 26 (9.0)              |
| Flu like symptoms                                           | 9 (3.1)                | 10 (3.5)              |
| Pain                                                        | 10 (3.4)               | 5 (1.7)               |
| Malaise                                                     | 8 (2.7)                | 6 (2.1)               |
| Chest pain                                                  | 4 (1.4)                | 8 (2.8)               |
| <b>Infections and infestations</b>                          | 118 (40.5)             | 128 (44.3)            |
| Upper respiratory infection                                 | 73 (25.1)              | 88 (30.4)             |
| Pneumonia                                                   | 27 (9.3)               | 42 (14.5)             |
| Cold                                                        | 21 (7.2)               | 20 (6.9)              |
| Sinusitis                                                   | 15 (5.2)               | 15 (5.2)              |
| Herpes zoster                                               | 6 (2.1)                | 10 (3.5)              |
| Influenza                                                   | 6 (2.1)                | 8 (2.8)               |

| <b>Event – no. (%)</b>                                                     | <b>RVd-alone<br/>(N = 291)</b> | <b>RVd+ASCT<br/>(N = 289)</b> |
|----------------------------------------------------------------------------|--------------------------------|-------------------------------|
| <b>Investigations</b>                                                      | 46 (15.8)                      | 47 (16.3)                     |
| Elevated liver enzymes                                                     | 15 (5.2)                       | 23 (8.0)                      |
| Creatinine increased                                                       | 6 (2.1)                        | 10 (3.5)                      |
| Blood bilirubin increased                                                  | 8 (2.7)                        | 4 (1.4)                       |
| <b>Metabolism and nutrition disorders</b>                                  | 79 (27.1)                      | 60 (20.8)                     |
| Hypophosphatemia                                                           | 28 (9.6)                       | 25 (8.7)                      |
| Hypokalemia                                                                | 29 (10.0)                      | 15 (5.2)                      |
| Anorexia                                                                   | 18 (6.2)                       | 11 (3.8)                      |
| Hypomagnesemia                                                             | 11 (3.8)                       | 7 (2.4)                       |
| Hypocalcemia                                                               | 13 (4.5)                       | 3 (1.0)                       |
| Hyperglycemia                                                              | 7 (2.4)                        | 6 (2.1)                       |
| <b>Musculoskeletal and connective tissue disorders</b>                     | 79 (27.1)                      | 86 (29.8)                     |
| Myalgia                                                                    | 20 (6.9)                       | 17 (5.9)                      |
| Cramps                                                                     | 16 (5.5)                       | 20 (6.9)                      |
| Muscle cramps                                                              | 11 (3.8)                       | 15 (5.2)                      |
| Arthralgia                                                                 | 9 (3.1)                        | 16 (5.5)                      |
| Back pain                                                                  | 7 (2.4)                        | 10 (3.5)                      |
| <b>Neoplasms benign, malignant and unspecified (incl cysts and polyps)</b> | 18 (6.2)                       | 21 (7.3)                      |
| Squamous cell carcinoma                                                    | 9 (3.1)                        | 4 (1.4)                       |
| <b>Nervous system disorders</b>                                            | 140 (48.1)                     | 118 (40.8)                    |
| Neuropathy <sup>†</sup>                                                    | 102 (35.1)                     | 88 (30.4)                     |
| Sensory peripheral neuropathy                                              | 89 (30.6)                      | 77 (26.6)                     |
| Paresthesia                                                                | 19 (6.5)                       | 13 (4.5)                      |
| Headache                                                                   | 17 (5.8)                       | 14 (4.8)                      |
| Neuropathy                                                                 | 17 (5.8)                       | 14 (4.8)                      |
| Memory impairment                                                          | 9 (3.1)                        | 16 (5.5)                      |
| Dizziness                                                                  | 14 (4.8)                       | 7 (2.4)                       |
| Dysgeusia                                                                  | 13 (4.5)                       | 7 (2.4)                       |
| Tremor                                                                     | 5 (1.7)                        | 8 (2.8)                       |
| <b>Psychiatric disorders</b>                                               | 26 (8.9)                       | 24 (8.3)                      |
| Insomnia                                                                   | 20 (6.9)                       | 15 (5.2)                      |
| Depression                                                                 | 5 (1.7)                        | 8 (2.8)                       |
| <b>Respiratory, thoracic and mediastinal disorders</b>                     | 60 (20.6)                      | 55 (19.0)                     |
| Dyspnea                                                                    | 29 (10.0)                      | 33 (11.4)                     |
| Cough                                                                      | 20 (6.9)                       | 16 (5.5)                      |
| Nasal congestion                                                           | 14 (4.8)                       | 16 (5.5)                      |
| Sore throat                                                                | 9 (3.1)                        | 8 (2.8)                       |
| <b>Skin and subcutaneous tissue disorders</b>                              | 64 (22.0)                      | 80 (27.7)                     |
| Maculo-papular rash                                                        | 29 (10.0)                      | 34 (11.8)                     |
| Dry skin                                                                   | 25 (8.6)                       | 22 (7.6)                      |
| Pruritis                                                                   | 7 (2.4)                        | 8 (2.8)                       |

| <b>Event – no. (%)</b>                                      | <b>RVd-alone<br/>(N = 291)</b> | <b>RVd+ASCT<br/>(N = 289)</b> |
|-------------------------------------------------------------|--------------------------------|-------------------------------|
| <b>Vascular disorders</b>                                   | 27 (9.3)                       | 38 (13.1)                     |
| Hypertension                                                | 14 (4.8)                       | 19 (6.6)                      |
| Hot flashes                                                 | 6 (2.1)                        | 6 (2.1)                       |
| All thromboembolic events <sup>‡</sup>                      | 7 (2.4)                        | 14 (4.8)                      |
| Thromboembolic event                                        | 5 (1.7)                        | 7 (2.4)                       |
| <b>Grade 3 or higher events</b>                             |                                |                               |
| <b>Any event</b>                                            | 129 (44.3)                     | 177 (61.2)                    |
| <b>Any hematologic event</b>                                | 76 (26.1)                      | 121 (41.9)                    |
| <b>Blood and lymphatic system disorders</b>                 | 76 (26.1)                      | 122 (42.2)                    |
| Neutropenia                                                 | 68 (23.4)                      | 107 (37.0)                    |
| Leukopenia                                                  | 14 (4.8)                       | 26 (9.0)                      |
| Thrombocytopenia                                            | 3 (1.0)                        | 27 (9.3)                      |
| Lymphopenia                                                 | 9 (3.1)                        | 9 (3.1)                       |
| <b>Gastrointestinal disorders</b>                           | 11 (3.8)                       | 12 (4.2)                      |
| Diarrhea                                                    | 9 (3.1)                        | 5 (1.7)                       |
| <b>General disorders and administration site conditions</b> | 12 (4.1)                       | 20 (6.9)                      |
| Fatigue                                                     | 9 (3.1)                        | 13 (4.5)                      |
| <b>Infections and infestations</b>                          | 22 (7.6)                       | 36 (12.5)                     |
| Pneumonia                                                   | 13 (4.5)                       | 20 (6.9)                      |
| <b>Investigations</b>                                       | 8 (2.7)                        | 7 (2.4)                       |
| Elevated liver enzymes                                      | 15 (5.2)                       | 23 (8.0)                      |
| Creatinine increased                                        | 6 (2.1)                        | 10 (3.5)                      |
| Blood bilirubin increased                                   | 8 (2.7)                        | 4 (1.4)                       |
| <b>Metabolism and nutrition disorders</b>                   | 27 (9.3)                       | 17 (5.9)                      |
| Hypophosphatemia                                            | 20 (6.9)                       | 13 (4.5)                      |
| <b>Nervous system disorders</b>                             | 4 (1.4)                        | 17 (5.9)                      |
| Neuropathy <sup>†</sup>                                     | 4 (1.4)                        | 10 (3.5)                      |

<sup>†</sup>Neuropathy events include sensory peripheral neuropathy, sensory neuropathy, and neuropathy. <sup>‡</sup>All thromboembolic events include pulmonary embolism, thromboembolic event, stroke, and deep vein thrombosis. ASCT, autologous stem cell transplantation. RVd, lenalidomide, bortezomib, dexamethasone.

**Table S4: Serious adverse events reported in the RVd-alone and RVd+ASCT arms**

| <b>SAE – no. (%)</b>                     | <b>RVd-alone (N = 357)</b> | <b>RVd+ASCT (N = 365)</b> |
|------------------------------------------|----------------------------|---------------------------|
| <b>Any SAE</b>                           | 176 (49.3)                 | 235 (64.4)                |
| Any RVd-related SAE                      | 144 (40.3)                 | 172 (47.1)                |
| <b>Infections</b>                        |                            |                           |
| Any SAE                                  | 47 (13.2)                  | 77 (21.1)                 |
| Any RVd-related SAE                      | 42 (11.8)                  | 58 (15.9)                 |
| <b>Thromboembolic events*</b>            |                            |                           |
| Any SAE                                  | 13 (3.6)                   | 21 (5.8)                  |
| Any RVd-related SAE                      | 11 (3.1)                   | 14 (3.8)                  |
| <b>SAEs occurring during maintenance</b> | n = 291                    | n = 289                   |
| Any SAE                                  | 35 (12.0)                  | 54 (18.7)                 |
| Any lenalidomide-related SAE             | 33 (11.3)                  | 48 (16.6)                 |

\*Thromboembolic events include pulmonary embolism, thromboembolic event, stroke, and deep vein thrombosis. ASCT, autologous stem cell transplantation. RVd, lenalidomide, bortezomib, dexamethasone. SAE, serious adverse event.



**Table S5: Second primary malignancies reported in the RVd-alone and RVd+ASCT arms**

| Patients – no. (%)                                                                 | RVd-alone<br>(N = 357) | RVd+ASCT<br>(N = 365) |
|------------------------------------------------------------------------------------|------------------------|-----------------------|
| <b>Patients with any second primary malignancy*</b>                                | 37 (10.4)              | 39 (10.7)             |
| Number of second primary malignancies                                              | 44                     | 44                    |
| Median time to second primary malignancy events from randomization (range), months | 44.3<br>(0.6–123.2)    | 44.5<br>(2.3–85.5)    |
| <b>Patients with any invasive second primary malignancy†</b>                       | 19 (5.3)               | 25 (6.8)              |
| <b>Patients with any second primary hematologic malignancy</b>                     | 9 (2.5)                | 13 (3.6)              |
| Acute lymphoblastic leukemia‡                                                      | 7                      | 3                     |
| Acute myeloid leukemia                                                             | 0                      | 4                     |
| Myelodysplastic syndromes§                                                         | 0                      | 6                     |
| Chronic lymphocytic leukemia                                                       | 1                      | 0                     |
| Chronic myelogenous leukemia                                                       | 1                      | 0                     |
| <b>Patients with any second primary solid tumor</b>                                | 12 (3.4)               | 12 (3.3)              |
| Anal cancer                                                                        | 2                      | 0                     |
| Bladder cancer                                                                     | 0                      | 1                     |
| Breast cancer                                                                      | 2                      | 2                     |
| GIST                                                                               | 0                      | 1                     |
| Kidney cancer                                                                      | 1                      | 0                     |
| Lung cancer                                                                        | 0                      | 2                     |
| Melanoma                                                                           | 5                      | 4                     |
| Nerve sheath tumor                                                                 | 0                      | 1                     |
| Prostate cancer                                                                    | 2                      | 0                     |
| Rectal cancer                                                                      | 0                      | 1                     |
| <b>Patients with any non-invasive second primary solid tumor</b>                   | 0                      | 2 (0.5)               |
| Breast cancer (DCIS)                                                               | 0                      | 1                     |
| Melanoma in situ                                                                   | 0                      | 1                     |
| <b>Patients with any second primary non-melanoma skin cancer¶</b>                  | 21 (5.9)               | 15 (4.1)              |
| Basal cell carcinoma                                                               | 6                      | 8                     |
| Squamous cell carcinoma                                                            | 15                     | 7                     |

\*Patients could have multiple second primary malignancies at different specific sites; reports of duplicate specific sites are excluded. †'Invasive' includes all second primary malignancies except for non-melanoma skin cancer and non-invasive second primary malignancies. ‡Includes the reported terms of acute lymphoblastic leukemia, acute lymphocytic leukemia, and lymphoblastic lymphoma. §One patient on the RVd+ASCT arm was reported as having myelodysplastic syndrome and then acute myeloid leukemia; they are counted only once – as a case of myelodysplastic syndrome – in the data on second primary hematologic malignancies. ¶One patient on the RVd-alone arm was reported as having basal cell carcinoma and squamous cell carcinoma in the same cycle; they are counted only once, as basal cell carcinoma. Two patients, one on each arm, were reported as having squamous cell carcinoma and then basal cell carcinoma; they are counted only once as squamous cell carcinoma. ASCT, autologous stem cell transplantation. DCIS, ductal carcinoma *in situ*. GIST, gastrointestinal stromal tumor. RVd, lenalidomide, bortezomib, dexamethasone.

**Table S6: Compliance with patient-reported quality-of-life assessments among patients in the RVd-alone and RVd+ASCT populations**

| Instrument / time-point – no. / total no. (%) | RVd-alone (N = 357) | RVd+ASCT (N = 365) |
|-----------------------------------------------|---------------------|--------------------|
| <b>EORTC QLQ-C30</b>                          |                     |                    |
| Cycle 1 (Baseline)                            | 326/357 (91.3)      | 332/364 (91.2)     |
| Cycle 2                                       | 270/348 (77.6)      | 300/363 (82.6)     |
| Pre-mobilization                              | 250/317 (78.9)      | 254/292 (87.0)     |
| Cycle 5 (RVd-alone) / post-ASCT (RVd+ASCT)    | 260/313 (83.1)      | 183/309 (59.2)     |
| Cycle 8 (RVd-alone) / cycle 5 (RVd+ASCT)      | 238/298 (79.9)      | 225/291 (77.3)     |
| Maintenance                                   | 203/243 (83.5)      | 207/261 (79.3)     |
| 2 years                                       | 122/186 (65.6)      | 143/221 (64.7)     |
| 3 years                                       | 102/160 (63.8)      | 109/185 (58.9)     |
| End of treatment                              | 161/278 (57.9)      | 160/276 (58.0)     |
| <b>EORTC QLQ-MY20</b>                         |                     |                    |
| Cycle 1 (Baseline)                            | 326/357 (91.3)      | 332/364 (91.2)     |
| Cycle 2                                       | 270/348 (77.6)      | 300/363 (82.6)     |
| Pre-mobilization                              | 250/317 (78.9)      | 254/292 (87.0)     |
| Cycle 5 (RVd-alone) / post-ASCT (RVd+ASCT)    | 260/313 (83.1)      | 183/309 (59.2)     |
| Cycle 8 (RVd-alone) / cycle 5 (RVd+ASCT)      | 238/298 (79.9)      | 225/291 (77.3)     |
| Maintenance                                   | 203/243 (83.5)      | 207/261 (79.3)     |
| 2 years                                       | 122/186 (65.6)      | 143/221 (64.7)     |
| 3 years                                       | 102/160 (63.8)      | 109/185 (58.9)     |
| End of treatment                              | 161/278 (57.9)      | 160/276 (58.0)     |
| <b>FACT/GOG-NTx</b>                           |                     |                    |
| Cycle 1 (Baseline)                            | 312/357 (87.4)      | 316/364 (86.8)     |
| Cycle 2                                       | 282/348 (81.0)      | 302/363 (83.2)     |
| Pre-mobilization                              | 231/317 (72.9)      | 233/292 (79.8)     |
| Cycle 5 (RVd-alone) / post-ASCT (RVd+ASCT)    | 265/313 (84.7)      | 171/309 (55.3)     |
| Cycle 8 (RVd-alone) / cycle 5 (RVd+ASCT)      | 238/298 (79.9)      | 229/291 (78.7)     |
| Maintenance                                   | 190/243 (78.2)      | 194/261 (74.3)     |
| 2 years                                       | 116/186 (62.4)      | 139/221 (62.9)     |
| 3 years                                       | 102/160 (63.8)      | 111/185 (60.0)     |
| End of treatment                              | 154/278 (55.4)      | 154/276 (55.8)     |

ASCT, autologous stem cell transplantation. C30, core 30 module. EORTC, European Organization for the Research and Treatment of Cancer. FACT, Functional Assessment of Cancer Therapy. GOG, Gynecologic Oncology Group. MY20, myeloma-specific module. Ntx, neurotoxicity. QLQ, quality of life questionnaire. RVd, lenalidomide, bortezomib, dexamethasone.

**Table S7: Summary of subsequent therapies received**

| <b>Subsequent therapies received by patients off study protocol therapy</b>  | <b>RVd-alone<br/>(N = 279)</b> | <b>RVd+ASCT<br/>(N = 276)</b> |
|------------------------------------------------------------------------------|--------------------------------|-------------------------------|
| <b>Any subsequent therapy – no. (%)</b>                                      | 222 (79.6)                     | 192 (69.6)                    |
| <b>Received subsequent therapy prior to disease progression</b>              | 5                              | 15                            |
| <b>No recorded disease progression prior to death</b>                        | 9                              | 11                            |
| <b>Subsequent therapy</b>                                                    | n = 222                        | n = 192                       |
| <b>Any immunomodulatory drug within subsequent therapy</b>                   | 124 (55.9)                     | 112 (58.3)                    |
| <b>Pomalidomide</b>                                                          | 67 (30.2)                      | 56 (29.2)                     |
| <b>Lenalidomide</b>                                                          | 57 (25.7)                      | 56 (29.2)                     |
| <b>Any proteasome inhibitor within subsequent therapy</b>                    | 124 (55.9)                     | 96 (50.0)                     |
| <b>Bortezomib</b>                                                            | 61 (27.5)                      | 49 (25.5)                     |
| <b>Carfilzomib</b>                                                           | 47 (21.2)                      | 32 (16.7)                     |
| <b>Ixazomib</b>                                                              | 18 (8.1)                       | 15 (7.8)                      |
| <b>Marizomib</b>                                                             | 0 (0)                          | 1 (0.5)                       |
| <b>Any monoclonal antibody within subsequent therapy</b>                     | 36 (16.2)                      | 53 (27.6)                     |
| <b>Daratumumab</b>                                                           | 25 (11.3)                      | 41 (21.4)                     |
| <b>Elotuzumab</b>                                                            | 10 (4.5)                       | 12 (6.3)                      |
| <b>Isatuximab</b>                                                            | 1 (0.5)                        | 0 (0.0)                       |
| <b>Corticosteroid</b>                                                        | 137 (61.7)                     | 125 (65.1)                    |
| <b>Chemotherapy</b>                                                          | 20 (9.0)                       | 11 (5.7)                      |
| <b>Panobinostat</b>                                                          | 2 (0.9)                        | 4 (2.1)                       |
| <b>Other therapy</b>                                                         | 8 (3.6)                        | 14 (7.3)                      |
| <b>Radiation</b>                                                             | 15 (6.8)                       | 6 (3.1)                       |
| <b>ASCT within next therapy</b>                                              | 29 (13.1)                      | 11 (5.7)                      |
| <b>ASCT received at any time following end of study treatment – no. (%)*</b> | 78 / 279 (28.0)                | 26 / 55 (47.3)                |

\*RVd-alone group includes all patients no longer receiving study protocol therapy. RVd+ASCT group shows data only for patients who discontinued study protocol therapy prior to undergoing on-study ASCT.

ASCT, autologous stem cell transplantation. RVd, lenalidomide, bortezomib, dexamethasone.

## Supplementary References

1. Kumar S, Paiva B, Anderson KC, et al. International Myeloma Working Group consensus criteria for response and minimal residual disease assessment in multiple myeloma. *Lancet Oncol* 2016;17:e328-e46.
2. Durie BG, Harousseau JL, Miguel JS, et al. International uniform response criteria for multiple myeloma. *Leukemia* 2006;20:1467-73.
3. Dejoie T, Corre J, Caillon H, et al. Serum free light chains, not urine specimens, should be used to evaluate response in light-chain multiple myeloma. *Blood* 2016;128:2941-8.
4. Attal M, Lauwers-Cances V, Hulin C, et al. Lenalidomide, Bortezomib, and Dexamethasone with Transplantation for Myeloma. *N Engl J Med* 2017;376:1311-20.
5. Perrot A, Lauwers-Cances V, Cazaubiel T, et al. Early Versus Late Autologous Stem Cell Transplant in Newly Diagnosed Multiple Myeloma: Long-Term Follow-up Analysis of the IFM 2009 Trial. *Blood* 2020;136:39.
6. McCarthy PL, Owzar K, Hofmeister CC, et al. Lenalidomide after stem-cell transplantation for multiple myeloma. *N Engl J Med* 2012;366:1770-81.
7. McCarthy PL, Holstein SA, Petrucci MT, et al. Lenalidomide Maintenance After Autologous Stem-Cell Transplantation in Newly Diagnosed Multiple Myeloma: A Meta-Analysis. *J Clin Oncol* 2017;35:3279-89.
8. Roussel M, Hebraud B, Hulin C, et al. Health-related quality of life results from the IFM 2009 trial: treatment with lenalidomide, bortezomib, and dexamethasone in transplant-eligible patients with newly diagnosed multiple myeloma. *Leuk Lymphoma* 2020;61:1323-33.
